1        **The decrotonylase FoSir5 facilitates mitochondrial metabolic state**  
2                    **switching in conidial germination of *Fusarium oxysporum***

3

4        **Ning Zhang<sup>1,†</sup>, Limin Song<sup>1,†</sup>, Yang Xu<sup>1</sup>, Xueyuan Pei<sup>2</sup>, Ben F. Luisi<sup>2</sup>, Wenxing**  
5        **Liang<sup>1,\*</sup>**

6

7        <sup>1</sup> Key Lab of Integrated Crop Pest Management of Shandong Province, College of  
8        Plant Health and Medicine, Qingdao Agricultural University, Qingdao, China

9        <sup>2</sup> Department of Biochemistry, University of Cambridge, Cambridge, UK

10

11        † N.Z. and L.S. contributed equally to this work.

12

13        \*For correspondence: wliang1@qau.edu.cn

14

15

16

17

18

19

20

21

22

23 **Abstract**

24 *Fusarium oxysporum* is one of the most important pathogenic fungi with a broad  
25 range of plant and animal hosts. The first key step of its infection cycle is conidial  
26 germination, but there is limited information available on the molecular events  
27 supporting this process. We show here that germination is accompanied by a sharp  
28 decrease in expression of FoSir5, an ortholog of the human lysine deacetylase SIRT5.  
29 We observe that FoSir5 deacetylates a subunit of the fungal pyruvate  
30 dehydrogenase complex (FoDLAT) at K148, resulting in inhibition of the activity of  
31 the complex in mitochondria. Moreover, FoSir5 deacetylates histone H3K18,  
32 leading to a downregulation of transcripts encoding enzymes of aerobic respiration  
33 pathways. Thus, the activity of FoSir5 coordinates regulation in different organelles to  
34 steer metabolic flux through respiration. As ATP content is positively related to fungal  
35 germination, we propose that FoSir5 negatively modulates conidial germination in *F.*  
36 *oxysporum* through its metabolic impact. These findings provide insights into the  
37 multifaceted roles of deacetylation, catalysed by FoSir5, that support conidial  
38 germination in *F. oxysporum*.

39

40

41

42

43

44

## 45 **Introduction**

46 *Fusarium oxysporum* is a transkingdom pathogen known to infect more than 100 plant  
47 species (Michielse & Rep, 2009) and immune-compromised patients (Nucci &  
48 Anaissie, 2007). Therefore, it is of great importance to gain insight into the molecular  
49 processes involved in pathogenesis of this fungus. *F. oxysporum* invades roots and can  
50 cause wilt diseases through colonization of xylem tissue. Fungal conidia are the first  
51 structures that the host immune system encounters during infection, and conidial  
52 germination is a crucial step for *F. oxysporum* infection. The early initiation stage of  
53 conidial germination represents a critical point to inhibit fungal growth and counter  
54 pathogenic infection (Deng, Yang et al., 2015). However, the molecular mechanism  
55 by which *F. oxysporum* regulates its germination process remains largely unknown.

56 Lysine acetylation, one of the most common post-translational modifications  
57 (PTMs), is involved in regulation of conidial germination in plant-associated fungi  
58 (Dubey, Lee et al., 2019, Wang, Cai et al., 2018, Zhang, Yang et al., 2020b). In recent  
59 decades, besides acetylation, numerous other short-chain acylation modifications have  
60 been discovered on lysine (K) residues, including crotonylation, malonylation,  
61 succinylation, propionylation, glutarylation, and butyrylation (Chen, Sprung et al.,  
62 2007, Hirschev & Zhao, 2015, Kim, Sprung et al., 2006, Park, Chen et al., 2013, Tan,  
63 Luo et al., 2011b, Tan, Peng et al., 2014b). Among them, lysine crotonylation (Kcr),  
64 first identified on histones, is also able to target other proteins involved in various  
65 cellular processes (Wei, Mao et al., 2017b, Wu, Li et al., 2017, Xu, Wan et al., 2017).  
66 Kcr is recognized by histone-binding “reader” modules, including AF9 YEATS,

67 YEATS2, MOZ and DPF2, in a type- and site-specific manner (Li, Sabari et al., 2016,  
68 Xiong, Panchenko et al., 2016, Zhao, Guan et al., 2016). Histone crotonylation by  
69 p300 has been shown to promote transcription *in vitro* and manipulating cellular  
70 concentration of crotonyl-CoA affects gene expression (Sabari, Tang et al., 2015).  
71 Although a recent proteomic analysis reveals that Kcr is tightly associated with  
72 virulence of the necrotrophic fungus *Botrytis cinerea* (Zhang, Yang et al., 2020a), it is  
73 not clear whether this modification is involved in the regulation of fungal  
74 germination.

75 Previous studies have identified histone deacetylase SIRT1 as being responsible  
76 for the removal of crotonylation in the nucleus (Bao, Wang et al., 2014, Feldman,  
77 Baeza et al., 2013, Wei, Liu et al., 2017a). The NAD<sup>+</sup>-dependent sirtuins (SIRTs) have  
78 an expanded repertoire of deacylase activities and display widespread subcellular  
79 distributions (Bell & Guarente, 2011, Cen, Y Youn et al., 2011, Kanfi, Naiman et al.,  
80 2012). Three mammalian sirtuins (SIRT3, SIRT4 and SIRT5) localize mostly or  
81 exclusively to the mitochondrial matrix, the powerhouse of the cell producing the  
82 bulk of cellular ATP through oxidative phosphorylation (Ryan, 2018). SIRT3 is  
83 considered the major deacetylase of mitochondria (Lombard, Alt et al., 2007), while  
84 SIRT4 mainly functions as a lipoamidase that regulates pyruvate dehydrogenase  
85 complex activity (Mathias, Greco et al., 2014). SIRT5, which possesses poor  
86 deacetylase activity (Du, Zhou et al., 2011), preferentially regulates the levels of  
87 lysine succinylation, malonylation, and glutarylation, playing multiple roles in  
88 regulating different metabolic pathways including glycolysis/gluconeogenesis, fatty

89 acid  $\beta$ -oxidation, oxidative phosphorylation, the urea cycle, and ketogenesis  
90 (Hirschey & Zhao, 2015, Park et al., 2013, Tan, Peng et al., 2014a). However, no  
91 information on the regulation of crotonylation in mitochondria is available.

92 The SIRT6s are also present in filamentous fungi and control a variety of cellular  
93 processes (Haigis & Sinclair, 2010). Seven SIRT6s, NST-1 to NST7, have been  
94 identified in *Neurospora crassa*, which mediate telomeric silencing in this fungus  
95 (Smith, Kothe et al., 2008). In *Podospora anserina*, deletion of *PaSir2* resulted in a  
96 significant reduction of cell life span (Boivin, Gaumer et al., 2008). The sirtuins, HstD  
97 in *Aspergillus oryzae* and sirtuin A in *A. nidulans*, control secondary metabolite  
98 production (Itoh, Shigemoto et al., 2017, Kawauchi, Nishiura et al., 2013). However,  
99 except for the characterization of *Magnaporthe oryzae MoSir2* in biotrophic growth in  
100 host rice plants (Fernandez, Marroquin-Guzman et al., 2014), relatively little is known  
101 about the function of SIRT6s in plant pathogens.

102 In this study, we show that the *F. oxysporum* FoSir5, an ortholog of the human  
103 lysine deacetylase, possesses decrotonylase activities *in vitro* and *in vivo*. In  
104 mitochondria, FoSir5 interacts with and removes the crotonyl group from the E2  
105 component dihydrolipoyllysine acetyltransferase (FoDLAT) of the pyruvate  
106 dehydrogenase complex (PDC), the activity of which links glycolysis to the  
107 tricarboxylic acid (TCA) cycle. The specific decrotonylation of K148 of FoDLAT by  
108 FoSir5 leads to decreased PDC activity and acetyl-CoA generation. FoSir5 is also  
109 distributed in nuclei, where it directly regulates the enrichment of crotonylated  
110 H3K18 (H3K18cr) on genes involved in the TCA cycle and electron transport chain

111 (ETC) pathways. The integrated regulation by FoSir5 in different organelles represses  
112 mitochondrial ATP biosynthesis, impeding fungal conidial germination. Importantly,  
113 we find that by decreasing the expression of *FoSir5*, *F. oxysporum* increases the ATP  
114 supply that supports the energy consumption demands of germination, emphasizing  
115 the importance of this regulatory process. These findings provide a clear example in  
116 which plant pathogenic fungi control conidial germination through an exquisite  
117 regulatory network that links metabolic activity to the developmental program of  
118 infection.

119

120

121

122

123

124

125

126

127

128

129

130

131

132

133 **Results**

134 **FoSir5 has both mitochondrial and extra-mitochondrial deacetylase activity in**

135 *vitro*

136 Members of the sirtuin family lysine deacetylases (KDACs) exhibit various  
137 subcellular localizations and are distributed in the nucleus, cytoplasm, and  
138 mitochondria (North & Verdin, 2004). However, none of the sirtuin KDACs in *F.*  
139 *oxysporum* have yet been characterized. The *F. oxysporum* genome contains seven  
140 genes predicted to encode a protein with the NAD<sup>+</sup>-dependent deacetylase domain  
141 typical of the sirtuin KDACs, the same number found in the genomes of human and  
142 the fungus *N. crassa* (Michishita, Park et al., 2005, Smith et al., 2008). We designated  
143 these genes *FoSir1* to *FoSir7* (Figure 1A).

144 The *FoSir5* (FOXG\_05932) gene encodes a 298-amino acid protein that is  
145 predicted partition to the fungal mitochondrion (using WoLF PSORT). Similar to  
146 NST-6 (Smith et al., 2008), *FoSir5* was identified as the closest homolog to human  
147 mitochondria-localized SIRT5 (Figure 1B). To confirm the subcellular localization of  
148 *FoSir5*, *FoSir5* cDNA was fused with green fluorescent protein (GFP) and  
149 transformed into *F. oxysporum*. As shown in Figure 1C, GFP-tagged *FoSir5* partially  
150 colocalized with a mitochondrial fluorophore, and a detectable *FoSir5* fraction was  
151 also present outside the organelle in the cytosol. Consistent with the confocal  
152 microscopy results, subcellular fractionation revealed that a significant fraction of  
153 *FoSir5*-GFP was present in the mitochondrion and cytosol (Figure 1D). The analysis  
154 also reveals a small fraction of *FoSir5* in the nuclear fraction. Like *F. oxysporum*

155 FoSir5, the human ortholog SIRT5 is also found both inside and outside the  
156 mitochondrion (Rardin, He et al., 2013).

157 Three human sirtuins, SIRT1-SIRT3, were recently suggested to remove crotonyl  
158 groups from histones *in vitro* (Bao et al., 2014). To investigate whether the FoSir5  
159 protein possesses similar activity, we incubated bacterially expressed and purified  
160 recombinant FoSir5 with native calf thymus histones (CTH) in the presence of  
161 crotonyl-CoA. The pan anti-Kcr antibody specifically recognizing crotonylated lysine  
162 residues (Liu, Yu et al., 2017, Tan, Luo et al., 2011a) was used for Western Blotting to  
163 detect Kcr signal. Histone Kcr was detected in the untreated CTH samples, in  
164 agreement with earlier studies (Sabari et al., 2015), and the addition of FoSir5 resulted  
165 in a decrease in histone Kcr (Figure 1E), indicating that FoSir5 is able to remove  
166 crotonyl groups from histones *in vitro*.

167 To investigate whether *FoSir5* is involved in regulating *F. oxysporum* growth, we  
168 assessed the expression of the gene during different growth phases by quantitative  
169 real-time PCR (qRT-PCR). As shown in Figure 1F, the expression of *FoSir5* was high  
170 in the conidia, decreased dramatically during the germination process (4-12 h), and  
171 then recovered in the mycelium at 24 h. These differential expression patterns suggest  
172 that *FoSir5* might play a role in the conidial germination of *F. oxysporum*.

173

#### 174 **FoSir5 modulates PDC activity by decrotonylating the E2 component of PDC**

175 Since a large proportion of FoSir5 was localized in the mitochondria, we explored  
176 whether FoSir5 is involved in the decrotonylation of mitochondrial proteins in *F.*



177 *oxysporum*. For this purpose, we utilized the FoSir5-GFP transformant and performed  
178 immunoprecipitation followed by LC-MS/MS. Among the candidate binding partners  
179 (Supplementary File 1), the E2 component of the pyruvate dehydrogenase complex,  
180 FoDLAT, a putative mitochondrial protein (FOXG\_11462), was selected for further  
181 analysis.

182 Fluorescence observation verified the expected mitochondrial localization of  
183 FoDLAT in *F. oxysporum* (Figure 2-figure supplement 1A). FoSir5-GFP and  
184 FoDLAT-Flag fusion constructs were co-introduced into *F. oxysporum* protoplasts,  
185 and positive transformants were selected. FoDLAT was detected in the proteins that  
186 eluted from anti-GFP beads using the anti-Flag antibody, suggesting that FoDLAT  
187 interacts with FoSir5 (Figure 2A). This interaction was also confirmed by *in vitro*  
188 pull-down assay, indicating a direct interaction between the two proteins (Figure 2B).

189 To test whether FoSir5 deacetylates FoDLAT, we first generated  $\Delta$ FoSir5  
190 deletion mutants by replacing the coding region with the hygromycin resistance  
191 cassette and FoSir5 overexpression strains fused with a C-terminal Flag tag driven by  
192 the strong constitutive promoter RP27. A total of 3 transformants from each group  
193 were obtained (Figure 2-figure supplement 2). The transformants from all groups had  
194 the same phenotypes, although only data for the mutant strain  $\Delta$ FoSir5.3 ( $\Delta$ FoSir5)  
195 and the overexpression strain FoSir5-Flag-1 (OE-1) are presented below. Then, we  
196 transformed and expressed FoDLAT-GFP in the Fo,  $\Delta$ FoSir5 and OE-1 strains. The  
197 crotonylation levels of immunoprecipitated FoDLAT were then tested. Compared with  
198 that in the Fo strain, we found markedly increased crotonylation of FoDLAT in

199  $\Delta$ FoSir5 (Figure 2-figure supplement 3). These data indicated that FoSir5 is  
200 responsible for the decrotonylation of FoDLAT. Although SIRT5 was reported to  
201 possess robust demalonylase, desuccinylase and deglutarylase activities in mammals  
202 (Hirschey & Zhao, 2015, Park et al., 2013, Tan et al., 2014a), our results showed that  
203 FoSir5 had no detectable impact on succinylation, malonylation, or glutarylation of  
204 the FoDLAT protein in *F. oxysporum* (Figure 2-figure supplement 3).

205 To determine the crotonylation sites of FoDLAT, we purified the FoDLAT-GFP  
206 fusion protein from *F. oxysporum* and identified by mass spectrometry lysine 148 as a  
207 site of modification (Figure 2-figure supplement 1B). To further confirm whether  
208 K148 is crotonylated *in vivo*, we mutated lysine 148 to arginine (R) or glutamine (Q),  
209 respectively, and developed a specific antibody against crotonylated K148 of FoDLAT  
210 (anti-K148cr-FoDLAT) to examine their crotonylation. Note that arginine and  
211 glutamine mimic non-acylated and acylated lysine, respectively, with respect to  
212 charge on the residues (Sun, Xu et al., 2020, Yu, Bu et al., 2020). The Western  
213 analyses detected signals with only the wild-type (WT) FoDLAT but not the Q and R  
214 mutants, indicating that K148 is indeed crotonylated *in vivo*. We also found that  
215 inactivation and overexpression of FoSir5 led to significantly increased and decreased  
216 K148 crotonylation of WT FoDLAT, respectively (Figure 2C and D). To further verify  
217 that FoSir5 plays a role in the decrotonylation of FoDLAT, an *in vitro* decrotonylation  
218 assay was performed using recombinant proteins purified from *E. coli*. The results  
219 showed that K148 crotonylation has also occurred on FoDLAT in *E. coli* and addition  
220 of FoSir5 in the presence of NAD<sup>+</sup> reduced K148 crotonylation of WT FoDLAT but

221 not the Q form (Figure 2E). These data demonstrate that FoSir5 is responsible for  
222 K148 decrotonylation of FoDLAT.

223 To explore how this crotonylation site might affect FoDLAT function, we first  
224 generated a homology model of the fungal enzyme based on the crystal structure of  
225 the homologous human E2. In the PDC assembly, E2 is the dihydrolipoyl  
226 acetyltransferase component, and comprises a biotin-lipoyl domain, an interaction  
227 domain that binds the dihydrolipoyl dehydrogenase (E3) component, and the catalytic  
228 domain. The crotonylation site maps to an intradomain linker that is predicted to be  
229 flexible (Figure 2-figure supplement 1C and D). The flexibility enables the  
230 biotin-lipoyl domain to shuttle substrates between the E1 and E2 catalytic sites and  
231 then to the E3 site for an oxidation step. Given that DLAT is likely an essential  
232 component of PDC function (no DLAT deletion mutants could be obtained after  
233 numerous attempts in this research), we examined the impact of changed FoSir5  
234 levels on the endogenous cellular activity of the PDC. PDC activity was elevated in  
235 the  $\Delta$ FoSir5 strain and reduced in the OE-1 strain compared with the Fo and the  
236 complemented strain  $\Delta$ FoSir5-C (Figure 2F). To further determine whether the  
237 crotonylation site of FoDLAT plays a role in PDC function, we detected PDC activity  
238 in the K148 mutant strains. As shown in Figure 2F, the K148Q and K148R mutant  
239 strains demonstrated increased and decreased PDC activity, respectively. Furthermore,  
240 the levels of acetyl-CoA, a direct product of E2 catalytic activity, followed a pattern  
241 similar to that of PDC activity among the different strains (Figure 2G). Collectively,  
242 these data establish a specific and prominent role of FoSir5 in FoDLAT

243 decrotonylation and PDC enzymatic inactivation.

244

245 **FoSir5 directly regulates the expression of genes related to aerobic respiration**  
246 **through H3K18 decrotonylation**

247 Subcellular fractionation showed a small portion of FoSir5 in the nuclei, and FoSir5

248 could remove crotonyl groups from histones *in vitro* (Figure 1C-E). This finding lead

249 us to explore whether FoSir5 regulates histone Kcr in cells. As shown in Figure 3A,

250 FoSir5 inactivation caused the accumulation of H3K18cr, but has little effect on

251 H3K18ac or H3K9cr. Therefore, we performed RNA-seq analysis to detect transcripts

252 that might be regulated by FoSir5 in *F. oxysporum*. Three biological replicates

253 consisting of mRNA isolated from the Fo and  $\Delta$ FoSir5 mutant strains were assessed,

254 identifying 1566 up- and 856 downregulated (fold change > 2, P < 0.05) genes in the

255  $\Delta$ FoSir5 compared with the Fo strain (Supplementary File 2). Given the function of

256 histone decrotonylases (HDCRs) in gene repression and H3K18cr in gene activation

257 (Sabari et al., 2015), we hypothesized that the target genes of FoSir5 were likely

258 among the upregulated genes. Gene Ontology (GO) functional annotation and KEGG

259 pathway analysis of those upregulated genes revealed significant enrichment of their

260 products in the TCA cycle, ETC and ATP synthesis (Figure 3-figure supplement 1).

261 We selected for experimental validation eight upregulated genes related to types of

262 energy metabolism, namely *NDHBI* (NADH-quinone oxidoreductase chain B 1),

263 *MDH* (malate dehydrogenase), *CYCI* (cytochrome C1), *IDH2* (isocitrate

264 dehydrogenase subunit 2), *SDH* (succinate dehydrogenase), *ATP5H* (ATP synthase D

265 chain), *NDH8* (NADH dehydrogenase iron-sulfur protein 8), and *CYBS* (succinate  
266 dehydrogenase cytochrome b small subunit) (Figure 3B). qRT-PCR analysis indicated  
267 that all of the 8 genes were indeed upregulated in the  $\Delta$ FoSir5 strain and  
268 downregulated in the OE-1 strain compared with the Fo and  $\Delta$ FoSir5-C strains  
269 (Figure 3C).

270 To determine whether FoSir5 directly regulates these 8 genes, a chromatin  
271 immunoprecipitation (ChIP) qPCR assay was performed using a GFP antibody.  
272 Primers in promoter regions near putative transcription start sites (TSSs) were  
273 designed to evaluate the enrichment of FoSir5-GFP in the 8 energy  
274 metabolism-related genes. The results showed that these regions were highly enriched  
275 by FoSir5 in the FoSir5-GFP strain compared with the Fo strain (Figure 3D). To test  
276 whether these promoter regions are also H3K18 crotonylation locations in genomic  
277 DNA, we further performed ChIP using an anti-H3K18cr antibody, followed by qPCR.  
278 As shown in Figure 3E, these regions were also enriched by H3K18cr in the  $\Delta$ FoSir5  
279 compared with the Fo strain. *FoACTIN* was used as a negative control which was not  
280 enriched by anti-GFP or anti-H3K18cr (Figure 3D and E). Overall, these observations  
281 demonstrated that FoSir5 and H3K18cr were enriched in the promoter regions of 8  
282 energy-related genes, indicating that FoSir5 and H3K18cr participate in the  
283 transcriptional regulation of metabolic energy-generating systems in *F. oxysporum*.

284

### 285 **FoSir5 represses ATP synthesis in germinating *F. oxysporum***

286 Most intracellular ATP comes from the oxidation of glucose-derived pyruvate by the

287 TCA cycle and oxidation of NADH in mitochondria via the ETC. As genes involved  
288 in mitochondrial ATP synthesis were directly regulated by FoSir5, we speculated that  
289 change of FoSir5 level will result in altered ATP content. As shown in Figure 4A-E,  
290 dramatic decrease of FoSir5 during germination led to reduced decrotonylase activity  
291 of this enzyme, and as a result, the K148 crotonylation of FoDLAT, PDC activity,  
292 acetyl-CoA generation, H3K18cr level and expression of the 8 energy-related genes  
293 were elevated. Meanwhile, declined enrichment of FoSir5 in promoter regions of  
294 these genes was observed (Figure 4F). Ultimately, the ATP content was elevated  
295 during the germinating process (Figure 4G). Consistent with these observations,  
296 inactivation of FoSir5 increased the level of ATP by ~70%, whereas overexpression of  
297 this enzyme significantly decreased ATP content in germinating conidia at 8 h post  
298 incubation (Figure 4H). Moreover, the FoSir5 mutant and overexpression strains  
299 exhibited a continuous high and low level of ATP during the whole germinating  
300 process, respectively (Figure 4-figure supplement 1), further confirming the  
301 relationship between FoSir5 and ATP.

302

### 303 **FoSir5 affects conidial germination of *F. oxysporum* by modulating ATP** 304 **generation**

305 Previous studies demonstrated that ATP plays a significant role in energizing cellular  
306 developmental processes (Wang, Mei et al., 2013). As conidial germination is of high  
307 energy-consumption, it is reasonable to envision that elevated ATP level benefits this  
308 process. Therefore, we determined germination rates of conidia treated with

309 exogenous ATP at different concentrations from 0  $\mu$ M to 50  $\mu$ M. Not unexpectedly,  
310 supply with at least 10  $\mu$ M ATP increased germination rate of *F. oxysporum* conidia  
311 by about 50% (Figure 5A).

312 Modulation of ATP levels of *F. oxysporum* to support germination is likely to  
313 involve an extensive regulatory network, and the sharp decline of FoSir5 during  
314 germination (Figure 1F) might be expected to be important for this process. To  
315 examine this point in more detail, we tested conidial germination of Fo,  $\Delta$ FoSir5 and  
316  $\Delta$ FoSir5-C mutant strains. We found that while inactivation of FoSir5 elevated  
317 conidial germination, reintroduction of FoSir5 recovered the phenotype of the WT  
318 strain. Conversely, overexpression of FoSir5 to mimic dysregulation of its decline led  
319 to obviously decreased germination (Figure 5B and C). Addition of exogenous ATP  
320 completely rescued the impeded germination of the OE-1 strain (Figure 5D),  
321 confirming an important role of ATP in conidial germination. In support of these  
322 observations, either K148Q mutation of FoDLAT or overexpression of key genes of  
323 the TCA cycle and ATP metabolism including *MDH*, *ATP5H* and *CYCI* (Figure  
324 5-figure supplement 1), led to elevated ATP and conidial germination, whereas the  
325 K148R mutant strain demonstrated decreased ATP level and germination (Figure 5E  
326 and F). Taken together, all of these data strongly suggest a crucial role for FoSir5 in  
327 conidial germination through modulating ATP generation.

328 Based on these results and those presented above, we propose a simple model to  
329 explain how FoSir5 modulates conidial germination of *F. oxysporum* (Figure 6). In  
330 mitochondria, FoSir5 binds and decrotonylates FoDLAT at K148, and this

331 modification inhibits the enzymatic activity of PDC leading to reduced production of  
332 acetyl-CoA. At the same time, FoSir5-catalyzed H3K18cr deacetylation in the  
333 nucleus transcriptionally represses the expression of genes participating in the TCA  
334 cycle and ETC pathways with acetyl-CoA being the initial substrate. Consequently,  
335 the coordinated regulation by FoSir5 in different organelles results in the repression of  
336 mitochondrial ATP synthesis. During conidial germination, by decreasing FoSir5 level,  
337 *F. oxysporum* eliminates inhibition of ATP metabolism essential for this process.

338

### 339 **FoSir5 is required for full virulence of *F. oxysporum* on tomato**

340 To determine whether FoSir5-mediated ATP metabolism affects pathogenicity of *F.*  
341 *oxysporum*, infection assays were performed by dipping the roots of 2-week-old  
342 tomato seedlings in conidial suspension of the Fo,  $\Delta$ FoSir5,  $\Delta$ FoSir5-C, and OE-1  
343 strains. In our repeated experiments, compared with Fo and  $\Delta$ FoSir5-C, the  $\Delta$ FoSir5  
344 strain exhibited higher infection ability, whereas overexpression of *FoSir5* reduced  
345 disease development by ~40% (Figure 4-figure supplement 2A and B). To determine  
346 whether altered level of FoSir5 affected *in planta* fungal growth, we quantified fungal  
347 biomass in roots by analyzing the expression level of *F. oxysporum FoEF-1 $\alpha$*  as an  
348 indicator. Consistent with the results of infection assays, the level of *FoEF-1 $\alpha$*  in  
349  $\Delta$ FoSir5 inoculated plants increased almost 2-fold, and the amount of fungal  
350 transcript was reduced by ~70% in OE-1 infected roots (Figure 4-figure supplement  
351 2C). These results indicate that FoSir5 exerts a negative effect on virulence of *F.*  
352 *oxysporum*, and the increased and decreased pathogenicity of  $\Delta$ FoSir5 and OE-1,



353    respectively, is likely due to increased and decreased germination rates.

354

355

356

357

358

359

360

361

362

363

364

365

366

367

368

369

370

371

372

373

374

375 **Discussion**

376 Lysine crotonylation, a newly discovered post-translational modification reversibly  
377 controlled by lysine crotonyltransferases and decrotonylases, is involved in numerous  
378 cellular processes, including chromatin remodelling, metabolism, protein folding and  
379 the cell cycle (Wan, Liu et al., 2019, Wei et al., 2017b, Xu et al., 2017). Although a  
380 growing number of crotonylated proteins have been identified in multiple organisms  
381 (Kwon, Kim et al., 2018, Liu, Xue et al., 2018, Sun, Liu et al., 2017, Sun, Qiu et al.,  
382 2019, Wei et al., 2017b, Zhang et al., 2020a), the enzymes responsible for lysine  
383 crotonylation and their physiological role remain poorly defined, especially for the  
384 decrotonylation of non-histone proteins. The information presented here indicates that  
385 a sirtuin family protein, FoSir5, functions as a lysine decrotonylase to modulate  
386 conidial germination in *F. oxysporum*. As such, these findings greatly expand our  
387 understanding of lysine decrotonylases and open up new possibilities for further  
388 investigations of the regulatory role of these enzymes.

389 The studies described here provide evidence that FoSir5 can modulate ATP  
390 synthesis through lysine decrotonylation in different organelles and thus conidial  
391 germination of *F. oxysporum*. Specifically, we found that (i) FoSir5 is distributed in  
392 different cellular compartments and possesses lysine decrotonylase activity; (ii) in  
393 mitochondrion, FoSir5 removes a crotonyl group from the K148 residue of FoDLAT,  
394 and therefore inhibits PDC activity and acetyl-CoA production; (iii) in the nucleus,  
395 FoSir5 represses the expression of genes associated with aerobic respiration by  
396 decrotonylating H3K18cr; (iv) the coordinated regulation by FoSir5 in the

397 mitochondrion and nucleus impacts on ATP synthesis; (v) ATP content is positively  
398 associated with conidial germination; and (vi) *F. oxysporum* downregulates *FoSir5*  
399 level during germination to elevate ATP level required for this process. These findings  
400 indicate that fungal pathogens employ an elaborate mechanism to carefully control  
401 energy metabolism. The mechanism by which *FoSir5* is downregulated during  
402 germination is a topic to be explored in future studies, but it is clear that this complex  
403 regulatory system serves as a salient example of how eukaryotes can control their  
404 development through regulating the action of a lysine decrotonylase.

405 Sirtuins are class III KDACs that require NAD for their deacylation activities.  
406 Seven sirtuin isoforms (SIRT1 to SIRT7) are expressed in mammalian cells. These  
407 isoforms display widespread subcellular distributions, as SIRT1, SIRT6 and SIRT7  
408 are nuclear, SIRT2 is predominantly cytoplasmic, and SIRTs3-5 are mitochondrial  
409 (Gertz & Steegborn, 2016, Michishita et al., 2005). Recent studies have shown the  
410 both mitochondrial and extra-mitochondrial localization of SIRT5 (Park et al., 2013),  
411 while SIRT1 and SIRT2 can accumulate in the cytosol and nucleus, respectively,  
412 under specific circumstances (Byles, Chmielewski et al., 2010, Vaquero, Scher et al.,  
413 2006). However, the synergistic action of sirtuins among different organelles is poorly  
414 characterized. Our findings that SIRT5 simultaneously act on histones in chromatin  
415 and enzymes in the mitochondria to modulate ATP generation provide a clear example  
416 of coordinated functions of one sirtuin protein in different cellular compartments.  
417 With the identification of more lysine deacylases in future research, it is likely that the  
418 findings reported here are only the beginning of what will be a widespread

419 phenomenon in eukaryotes.

420 By converting pyruvate to acetyl-CoA, PDC is an important gatekeeper that links  
421 glycolysis to the TCA cycle and oxidative phosphorylation. Therefore, controlling the  
422 activity of this enzyme complex impacts on metabolic flux and the efficiency of ATP  
423 generation. In mammalian cells, pyruvate dehydrogenase phosphatases  
424 dephosphorylate the E1 $\alpha$  subunit and activate the PDC, while SIRT5-mediated  
425 desuccinylation of PDC subunits, including mainly E1 $\alpha$ , E1 $\beta$  and E3, suppresses PDC  
426 activity (Park et al., 2013). The data described here provide evidence that FoSir5  
427 deacetylates the E2 subunit of the PDC at K148 and thus inhibits PDC activity in *F.*  
428 *oxysporum*. All these findings indicate that cells employ a variety of approaches to  
429 tightly regulate the activity of PDC. It will be of considerable interest to examine the  
430 coordinated effect exerted by different modifications in future studies.

431 Conidia are reproductive structures important for both dispersal and survival  
432 within harsh environments. In this study, we found that the expression level of *FoSir5*  
433 was higher in conidia than in other growth stages (Figure 1F), indicating that  
434 inhibition of mitochondrial ATP biosynthesis by FoSir5 may be helpful for  
435 maintaining low energy expenditure of conidia under unsuitable conditions.  
436 Thereafter, during the germination process needing high energy consumption, the  
437 expression of *FoSir5* sharply declined, resulting in enough ATP production to support  
438 breaking dormancy and the formation of a germ tube. Then, *FoSir5* levels were  
439 restored to a higher level in the mycelium, likely to control energy metabolism  
440 properly. Given the fact that conidial germination is crucial for infection and there is

441 limited information on the regulation of this process (Deng et al., 2015, Leroch,  
442 Kleber et al., 2013, Sharma, Sengupta et al., 2016), our findings that deletion of  
443 FoSir5 resulted in enhanced pathogenicity provide candidate target proteins for  
444 exploring new effective fungicides against *F. oxysporum* and other plant pathogens.

445

446

447

448

449

450

451

452

453

454

455

456

457

458

459

460

461

462

## 463 **Materials and methods**

### 464 **Fungal strains and culture conditions**

465 *F. oxysporum* f. sp. *lycopersici* strain 4287 (Fo) was used in all experiments. The  
466 fungus was stored at -80 °C as microconidial suspension with 30% glycerol. It was  
467 grown on potato dextrose agar (PDA) at 25 °C for 7 days in the dark to generate  
468 conidia. Spores were harvested using sterilized H<sub>2</sub>O and filtrated through four layers  
469 of sterile lens paper. Cultures were inoculated at a concentration of  $1 \times 10^7$  conidia/mL  
470 in YPD medium (2% peptone, 1% yeast extract, and 2% glucose) at 25 °C with  
471 shaking at 150 rpm. For conidial germination assay, fresh conidia of strains were  
472 harvested and adjusted to the concentration of  $2.5 \times 10^5$  conidia/ml in PDB (liquid  
473 PDA). Twenty  $\mu$ l of the conidial suspension were dropped onto coverslips and  
474 incubated in a moist chamber with a temperature of 25 °C. At least three independent  
475 experiments with triple replicates per experiment were performed.

476

### 477 **Target gene deletion, complementation, and overexpression**

478 The *FoSir5* gene deletion mutant was generated using the standard one-step gene  
479 replacement strategy (Figure 2-figure supplement 2A). First, 2 fragments with 0.7 kb  
480 of sequences flanking the targeted gene were PCR amplified with primer pairs  
481 UP-F/R and Down-F/R, respectively. Thereafter, the two flanking sequences were  
482 linked with a hygromycin-resistance cassette (HPH) by overlap PCR. The amplified  
483 fragment using primer pairs K-F/R was then purified and introduced into Fo  
484 protoplasts (Gronover, Kasulke et al., 2001, Jiang, Liu et al., 2011). Deletion mutants

485 were identified by PCR with primer pairs IN-F/R and OUT-F/R. For complementation,  
486 a fragment encompassing the entire *FoSir5* gene coding region and its native  
487 promoter region was amplified by PCR with primers FoSir5-C-F/R and inserted into  
488 pYF11 (G418 resistance) vector by the yeast gap repair approach (Bruno, Tenjo et al.,  
489 2004, Tang, Chen et al., 2020). Then, the construct was used for protoplast  
490 transformation of the  $\Delta$ FoSir5 mutant.

491 For site-directed mutagenesis of *FoDLAT*, we first tried to delete the *FoDLAT*  
492 gene, however, despite numerous attempts (over 200 transformants), we failed to  
493 obtain knockout mutants, indicating that FoDLAT disruption was lethal in Fo.  
494 Alternatively, *FoDLAT*<sup>K148Q</sup> or *FoDLAT*<sup>K148R</sup> genes with native promoter region was  
495 generated by fusion PCR using primer FoDLAT-C-F/R and cloned into pYF11  
496 plasmid to form GFP fusion constructs. Then the constructs were transformed into  
497 protoplast of Fo. After verification by PCR and sequencing, deletion of *FoDLAT* was  
498 performed as described above to generate strains FoDLAT<sup>K148Q</sup> and FoDLAT<sup>K148R</sup>,  
499 respectively.

500 For construction of the RP27:FoSir5/FoMDH/FoATP5H/FoCYC1:GFP vectors,  
501 we amplified fragments by PCR with primer pairs GFP-F/R of each gene,  
502 respectively. The fragments were then inserted into the pYF11 vector (Qi, Liu et al.,  
503 2016). For construction of the RP27:FoSir5/FoDLAT:Flag vectors, fragments  
504 amplified with primers FoSir5-Flag-F/R or FoDLAT-Flag-F/R were inserted into  
505 pHZ126 vector (hygromycin resistance). The constructs were then used for protoplast  
506 transformation of Fo or other strains. The primers used in this study were listed in

507 Supplementary File 3.

508

### 509 **Epifluorescence microscopy**

510 *F. oxysporum* cells expressing FoSir5-GFP or FoDLAT-GFP fusion proteins were  
511 incubated on PDA plates at 25 °C for 3 days. The mycelia of the tested strains were  
512 then collected and preincubated for 15 min with 200 nM MitoTracker Red CMRos  
513 (M7512, Invitrogen). After washing with phosphate-buffered saline (PBS), pH 7.4,  
514 the mycelia were stained with 1 µg/mL DAPI (D9542, Sigma) at room temperature in  
515 darkness for 5 min, followed by washing with PBS 3 times. Fluorescence microscope  
516 was performed using microscope of EVOS™ M5000 (Invitrogen).

517

### 518 **Subcellular fractionation analysis**

519 The nuclear and cytosolic proteins were extracted using Nuclear Protein Extraction  
520 Kit (R0050, Solarbio) and mitochondrial proteins were extracted by Mitochondrial  
521 Extraction Kit (SM0020, Solarbio), according to the instructions of the manufacturer.  
522 The obtained proteins were separated by SDS-PAGE and immunoblotted using  
523 anti-GFP (ab290, Abcam), anti-H3 (ab1791, Abcam), anti-Tubulin (PTM-1011, PTM  
524 Biolabs), and anti-ATP5A1 (459240, Thermo Fisher).

525

### 526 ***In vitro* HDCR assays**

527 pET28 construct containing His fused FoSir5 was expressed in BL21 *Escherichia coli*.

528 Protein expression was induced by adding isopropyl β-D-1-thiogalactopyranoside



529 (IPTG) to a final concentration of 0.2 mM when OD600 reached 0.6, and the culture  
530 was further grown at 16 °C overnight. Cells were harvested and resuspended in lysis  
531 buffer A (50 mM Tris-HCl, pH 7.5, 300 mM NaCl, 1 mM PMSF, and Roche EDTA  
532 free protease inhibitor). Following sonication and centrifugation, the supernatant was  
533 loaded onto a nickel column pre-equilibrated with lysis buffer. The column was  
534 washed with 5 column volumes of wash buffer (lysis buffer with 20 mM imidazole)  
535 and the bound proteins were then eluted with elution buffer (lysis buffer with 200 mM  
536 imidazole). After purification, proteins were dialyzed at 4 °C overnight. *In vitro*  
537 enzymatic reactions were performed as described previously (Liu et al., 2017). In  
538 brief, 50 µg native calf thymus histones (CTH, A002544, Sangon Biotech) were  
539 incubated with 0.5 µg recombinant FoSir5 protein at 30 °C for 1 hr in HDCR buffer  
540 (50 mM Tris pH 7.5, 5% glycerol, 5 mM NAD<sup>+</sup>, 0.1 mM EDTA, 50 mM NaCl, and  
541 0.2 mM PMSF) in the presence of 50, 100, or 200 µM crotonyl-CoA (C4282, Sigma).  
542 The assay mixture was then analyzed using western blotting by anti-PanKcr  
543 (PTM-501, PTM Biolabs) and anti-H3 (ab1791, Abcam).

544

#### 545 **Immunoprecipitation and mass spectrometry**

546 For identification of FoSir5 interacting proteins, mycelium of Fo and FoSir5-GFP  
547 strains were collected and frozen with liquid nitrogen. For total protein extraction, the  
548 samples were ground into a fine powder in liquid nitrogen and resuspended in lysis  
549 buffer (10 mM Tris-HCl, pH 7.5, 150 mM NaCl, 0.5 mM EDTA, 0.5% NP-40) with 2  
550 mM PMSF and proteinase inhibitor cocktail (Roche). The supernatant lysates were

551 then incubated with anti-GFP agarose (KTSM1301, KT HEALTH) at 4 °C for 2 h  
552 with gently shaking. Proteins bound to the beads were eluted after a series of  
553 washing steps by PBS. Elution buffer (200 mM glycine, pH 2.5) and neutralization  
554 buffer (1 M Tris base, pH 10.4) were used for the elution process. For identification of  
555 cronylation sites of FoDLAT, total proteins were isolated from FoDLAT-GFP strain  
556 and incubated with anti-GFP agarose. The eluted mixture was subsequently analyzed  
557 using liquid chromatography-tandem mass spectrometry (LC-MS/MS) conducted in  
558 PTM BIOLABS (Hangzhou, China).

559

#### 560 **Protein pull-down assays**

561 Coding domain sequence of FoDLAT or FoDLAT<sup>K148Q</sup> was cloned in pMAL vector  
562 for the N-terminal fusion with MBP. The fusion proteins were expressed in BL21 *E.*  
563 *coli*. Transformed cells were induced by adding IPTG to a final concentration of 0.2  
564 mM when OD600 reached 0.6, and the culture was further grown at 37 °C for 3 hr.  
565 Cells were harvested by centrifugation and lysed by sonication in lysis buffer A. For  
566 purification, amylose resin (New England Biolabs) was added to the clarified lysate  
567 and incubated for 2 h at 4 °C. Beads were then washed with 5 column volumes of  
568 PBS. MBP fusion proteins were eventually eluted in elution buffer supplemented with  
569 20 mM maltose and then dialyzed at 4 °C overnight. For pull-down assay, 1 µg  
570 purified FoSir5-His protein was mixed with 1 µg MBP or MBP-FoDLAT protein in  
571 the binding buffer (50 mM HEPES, pH 7.5, 1 mM EDTA, 150 mM NaCl, 0.5 mM  
572 DTT, and 0.8% glycerol) in a total volume of 100 µl at room temperature for 1 h. 30

573  $\mu$ l of amylose resin was added into the mixture and rotated at room temperature for 1  
574 h. The mixture was subsequently washed three times with 1 mL of binding buffer, and  
575 washed beads were boiled in 30  $\mu$ l of 2  $\times$  SDS sampling buffer at 100 °C for 5 min.  
576 The assay mixture was then analyzed using western blotting by anti-MBP (New  
577 England Biolabs) and anti-His (D2951, Beyotime).

578

### 579 **Generation of anti-K148cr-FoDLAT antibody**

580 FoDLAT K148 site-specific crotonylation antibody was generated by using a  
581 FoDLAT crotonylated peptide (KEEKSESK(cr)SESASAC) conjugated to KLH as an  
582 antigen. Antibodies were produced from rabbits by HUABIO (Hangzhou, China). The  
583 specificity of the antibody was tested by immunoblot analysis.

584

### 585 ***In vivo* decrotonylation assay**

586 For construction of the RP27:FoDLAT/FoDLAT<sup>K148Q</sup>/FoDLAT<sup>K148R</sup>:GFP vectors, we  
587 amplified fragments by PCR with primers FoDLAT-GFP-F/R, respectively. The  
588 fragments were then inserted into the pYF11 vector. Afterwards, the constructs were  
589 transformed into Fo,  $\Delta$ FoSir5, and OE-1, respectively. GFP fusion proteins in different  
590 pairs of strains were immunoprecipitated as described above. The eluted proteins were  
591 then analyzed by western blot using anti-GFP, anti-Kcr (PTM-501, PTM Biolabs),  
592 anti-Ksu (PTM-419, PTM Biolabs), anti-Kma (PTM-902, PTM Biolabs) and  
593 anti-Kglu (PTM-1152, PTM Biolabs), followed by quantification using Quantity One  
594 (Bio-Rad).

595

596 ***In vitro* decrotonylation assay**

597 Fifty ng of MBP-FoDLAT protein (WT or K148Q) was incubated with or without 50  
598 ng FoSir5-His protein in the absence or presence of 5 mM NAD<sup>+</sup> in 200 µl HDCR  
599 buffer for 1 h at 30 °C. Samples were analyzed by western blot using anti-PanKcr and  
600 anti-MBP, followed by quantification using Quantity One (Bio-Rad).

601

602 **PDC enzyme assay**

603 PDC activity was measured according to the protocol by PDC activity assay kit  
604 (ab109902, Abcam). The germinating conidia of the tested strains were grown in YPD  
605 at 25 °C for 8 h in a shaker. The total extracts were diluted and added into the  
606 microplate. After incubation in the plate for 3 hours at room temperature, the samples  
607 were stabilized and incubated with assay buffer. The fluorescence was measured at  
608 450 nm for 20 minutes with 20 seconds interval among each measurement, and the  
609 slope of the line indicated the PDC activity. The rates were determined as change in  
610 OD over time, represented as change in milliOD per minute.

611

612 **Quantification of acetyl-CoA**

613 Acetyl-coA was measured using an acetyl-CoA assay kit (BC0980, Solarbio). The  
614 germinating conidia of the tested strains grown in YPD at 25 °C for 8 h in a shaker  
615 were harvested and homogenized in lysis buffer of the kit in ice. The supernatant was  
616 used to determine acetyl-CoA concentration in triplicate according to manufacturer's

617 instructions.

618

### 619 **Quantification of ATP**

620 The ATP assay kit (S0026, Beyotime), which employs the luciferin-luciferase method  
621 (Drew & Leeuwenburgh, 2003), was used to quantify ATP. The working solution was  
622 prepared according to the kit protocol. The germinating conidia of the tested strains  
623 grown in YPD at 25 °C for 8 h in a shaker were harvested and homogenized in lysis  
624 buffer. Then, 100 µl of working solution and 20 µl of supernatant of the total extracts  
625 were added to each well of a 96-well microtiter plate. The luciferase signals was  
626 detected by a multifunctional microplate reader (SpectraMax M2) for 30 s. The  
627 standard curve of ATP concentration from 1 pM to 1 µM was prepared by gradient  
628 dilution.

629

### 630 **RNA sequencing**

631 The germinating conidia of Fo and  $\Delta$ FoSir5 with three biological replicates were  
632 harvested after growth in YPD medium with shaking at 150 rpm for 8 h in 25 °C.  
633 Total RNA was extracted using the TRIzol reagent according to the instructions of  
634 manufacturer. RNA-seq data were analyzed as previously described (Rodenburg,  
635 Terhem et al., 2018). Briefly, Cutadapt (v1.16) software was used to filter the  
636 sequencing data. Reference genome index was built by Bowtie2 (2.2.6) and the  
637 filtered reads were mapped to the reference genome using Tophat2 (2.0.14). HTSeq  
638 (0.9.1) statistics was used to compare the Read Count values on each gene as the

639 original expression of the gene, and then FPKM was used to standardize the  
640 expression. DESeq (1.30.0) was used to analyze the genes of difference expression  
641 with screened conditions as follows: an absolute  $\log_2$  value  $> 1$  and P value  $< 0.05$ . All  
642 the detected genes were shown in Supplementary File 2.

643

#### 644 **Fluorescent Real-time qPCR**

645 For qRT-PCR assessment of *FoSir5* expression, fresh spores were inoculated in YPD  
646 medium at 25 °C with shaking at 150 rpm. At 0, 4, 8, 12 and 24 h, the cultures were  
647 centrifuged at 12,000×g for 15 min and the pellets were collected for RNA extraction.  
648 For validation of RNA-seq data, three batches of biological repeats of Fo and  $\Delta$ FoSir5  
649 were independently collected. RNA was extracted and reverse transcribed using  
650 All-In-One RT MasterMix (abm). qRT-PCR was performed using M5 HiPer SYBR  
651 Premix EsTaq (Mei5bio). The transcript abundance of candidate genes were  
652 calculated using the  $2^{-\Delta C_t}$  method, normalized to *FoEF-1 $\alpha$*  (Elongation factor 1 $\alpha$ ). All  
653 primers used for qRT-qPCR were listed in Supplementary File 3.

654

#### 655 **ChIP-qPCR analysis**

656 ChIP was performed according to described methods (Liu, Jian et al., 2019). Briefly,  
657 the germinating conidia of different strains were harvested after growth in YPD  
658 medium with shaking at 150 rpm for 8 h in 25 °C. The germinating conidia were  
659 cross-linked with 1% formaldehyde gently shaking for 25 min and then stopped with  
660 glycine with a final concentration of 125 mM for another incubation of 10 min. After

661 cleaning with sterile water for several times, the cultures were frozen and ground with  
662 liquid nitrogen. The powder was re-suspended in the lysis buffer (250 mM HEPES pH  
663 7.5, 1 mM EDTA, 150 mM NaCl, 10 mM DTT, 0.1% deoxycholate, and 1% Triton)  
664 and protease inhibitor cocktail (Roche) with a conidia/buffer ratio as 0.2g/2ml. The  
665 DNA was sheared into ~500 bp fragments using sonicator (Bioruptor Plus CHIP,  
666 ultrasonication for 30s and stop for 30s, 10 times). The supernatant was diluted after  
667 centrifugation with CHIP dilution buffer (1.1% Triton X-100, 16.7 mM Tris-HCl pH  
668 8.0, 1.2 mM EDTA, 167 mM NaCl). Immunoprecipitation was conducted using 5  $\mu$ l  
669 anti-GFP antibody (ab290, Abcam) or 5  $\mu$ l anti-H3K18cr antibody (PTM-517, PTM  
670 Biolabs) together with protein A agarose (Roche) overnight at 4 °C. After separation,  
671 beads were washed orderly by low-salt wash buffer (150 mM NaCl, 0.2% SDS,  
672 20 mM Tris-HCl pH 8.0, 2 mM EDTA, 0.5% TritonX-100), high salt wash buffer  
673 (500 mM NaCl, 2 mM EDTA, 20 mM Tris-HCl pH 8.0, 0.2% SDS, 0.5% Triton  
674 X-100), LiCl wash buffer (0.25 M LiCl, 1% Nonidet P-40, 1% sodium deoxycholate,  
675 1 mM EDTA, 10 mM Tris-HCl pH 8.0), and TE buffer. DNA bound to the beads was  
676 then eluted and precipitated. ChIP-qPCR was independently repeated three times.  
677 Relative enrichment values were calculated by dividing the immunoprecipitated DNA  
678 by the input DNA and internal control gene ( *$\beta$ -tubulin*). Primers using for ChIP-qPCR  
679 were designed near putative TSS and listed in Supplementary File 3.

680

### 681 **Infection assays of *F. oxysporum* on tomato seedlings**

682 Briefly, 2-week-old tomato seedlings were used for root dip infection for 10 min in

683 spore suspension ( $10^6$  spores/mL). The infected plants were transplanted in sterile  
684 soil-vermiculite mixture (1:1 ratio) and kept in plant growth chamber at 25 °C and 90%  
685 relative humidity (RH). Severity of disease symptoms was recorded and scored  
686 according to the values ranging from 1 to 5: 1- few symptoms, only first true leaf  
687 necrotic or curled; 2- clear symptoms, first three leaves developed symptoms; 3-  
688 severe symptoms, leaves necrotic and curled, defoliation, growth retardation; 4- rotted  
689 plant but still alive; 5- dead plant. Disease index was calculated using the following  
690 formula: Disease index= $\Sigma$  (number of leaves in each disease grade $\times$ grades  
691 value)/(total number of assessed leaves $\times$ the highest grade value) (Yuan, Huang et al.,  
692 2019). This inoculation experiment was repeated twice to verify consistency in the  
693 observed results. qRT-PCR analysis of *F. oxysporum EF-1a* transcript levels was  
694 performed using tomato plants harvested after 14-day infection with different strains.  
695 The expression of tomato *RCE1*, a constitutively expressed gene, was used as a  
696 control for the use of equal amounts of RNA for RT-PCR.

697

698

699

700

701

702

703

704



705 **Acknowledgements**

706 This research was supported by the National Natural Science Foundation of China  
707 (31972213 and 32102149), the Shandong Provincial Natural Science Foundation  
708 (ZR2019BC070 and ZR2020KC003), Shandong Province “Double-Hundred Talent  
709 Plan” (WST2018008), and Taishan Scholar Construction Foundation of Shandong  
710 Province (tshw20130963). X.P. and B.F.L. were supported by the Wellcome Trust  
711 (200873/Z/16/Z).

712

713 **Data availability**

714 The RNA-seq raw reads are available in NCBI Sequence Read Archive (SRA)  
715 database with the accession number of PRJNA687117.

716

717 **Competing interests**

718 The authors declare that no competing interests exist.

719

720

721

722

723

724

725

726

727 **References**

- 728 Bao X, Wang Y, Li X, Li X-M, Liu Z, Yang T, Wong CF, Zhang J, Hao Q, Li XD (2014) Identification  
729 of 'erasers' for lysine crotonylated histone marks using a chemical proteomics approach. *Elife* 3:  
730 e02999
- 731 Bell EL, Guarente L (2011) The SirT3 divining rod points to oxidative stress. *Molecular Cell* 42:  
732 561-568
- 733 Boivin A, Gaumer S, Sainsard-Chanet A (2008) Life span extension by dietary restriction is  
734 reduced but not abolished by loss of both SIR2 and HST2 in *Podospora anserina*. *Mechanisms of*  
735 *ageing and development* 129: 714-21
- 736 Bruno KS, Tenjo F, Li L, Hamer JE, Xu JR (2004) Cellular localization and role of kinase activity of  
737 PMK1 in *Magnaporthe grisea*. *Eukaryotic cell* 3: 1525-32
- 738 Byles V, Chmielewski LK, Wang J, Zhu L, Forman LW, Faller DV, Dai Y (2010) Aberrant cytoplasm  
739 localization and protein stability of SIRT1 is regulated by PI3K/IGF-1R signaling in human cancer  
740 cells. *International journal of biological sciences* 6: 599-612
- 741 Cen Y, Y Youn D, A Sauve A (2011) Advances in characterization of human sirtuin isoforms:  
742 chemistries, targets and therapeutic applications. *Current medicinal chemistry* 18: 1919-1935
- 743 Chen Y, Sprung R, Tang Y, Ball H, Sangras B, Kim SC, Falck JR, Peng J, Gu W, Zhao Y (2007) Lysine  
744 propionylation and butyrylation are novel post-translational modifications in histones. *Molecular*  
745 *& Cellular Proteomics* 6: 812-819
- 746 Deng GM, Yang QS, He WD, Li CY, Yang J, Zuo CW, Gao J, Sheng O, Lu SY, Zhang S, Yi GJ (2015)  
747 Proteomic analysis of conidia germination in *Fusarium oxysporum* f. sp. cubense tropical race 4  
748 reveals new targets in ergosterol biosynthesis pathway for controlling *Fusarium* wilt of banana.  
749 *Applied microbiology and biotechnology* 99: 7189-207
- 750 Drew B, Leeuwenburgh C (2003) Method for measuring ATP production in isolated mitochondria:  
751 ATP production in brain and liver mitochondria of Fischer-344 rats with age and caloric restriction.  
752 *American journal of physiology Regulatory, integrative and comparative physiology* 285:  
753 R1259-67
- 754 Du J, Zhou Y, Su X, Yu JJ, Khan S, Jiang H, Kim J, Woo J, Kim JH, Choi BH, He B, Chen W, Zhang S,  
755 Cerione RA, Auwerx J, Hao Q, Lin H (2011) Sirt5 is a NAD-dependent protein lysine demalonylase  
756 and desuccinylase. *Science* 334: 806-9
- 757 Dubey A, Lee J, Kwon S, Lee YH, Jeon J (2019) A MYST family histone acetyltransferase, MoSAS3,  
758 is required for development and pathogenicity in the rice blast fungus. *Mol Plant Pathol* 20:  
759 1491-1505
- 760 Feldman JL, Baeza J, Denu JM (2013) Activation of the protein deacetylase SIRT6 by long-chain  
761 fatty acids and widespread deacylation by mammalian sirtuins. *Journal of Biological Chemistry*  
762 288: 31350-31356
- 763 Fernandez J, Marroquin-Guzman M, Nandakumar R, Shijo S, Cornwell KM, Li G, Wilson RA (2014)  
764 Plant defence suppression is mediated by a fungal sirtuin during rice infection by *Magnaporthe*  
765 *oryzae*. *Mol Microbiol* 94: 70-88
- 766 Gertz M, Steegborn C (2016) Using mitochondrial sirtuins as drug targets: disease implications  
767 and available compounds. *Cellular and molecular life sciences : CMLS* 73: 2871-96
- 768 Gronover CS, Kasulke D, Tudzynski P, Tudzynski B (2001) The role of G protein alpha subunits in  
769 the infection process of the gray mold fungus *Botrytis cinerea*. *Mol Plant Microbe Interact* 14:

770 1293-302  
771 Haigis MC, Sinclair DA (2010) Mammalian sirtuins: biological insights and disease relevance.  
772 *Annual review of pathology* 5: 253-95  
773 Hirschev MD, Zhao Y (2015) Metabolic Regulation by Lysine Malonylation, Succinylation, and  
774 Glutarylation. *Molecular & cellular proteomics : MCP* 14: 2308-15  
775 Itoh E, Shigemoto R, Oinuma KI, Shimizu M, Masuo S, Takaya N (2017) Sirtuin A regulates  
776 secondary metabolite production by *Aspergillus nidulans*. *J Gen Appl Microbiol* 63: 228-235  
777 Jiang J, Liu X, Yin Y, Ma Z (2011) Involvement of a velvet protein FgVeA in the regulation of  
778 asexual development, lipid and secondary metabolisms and virulence in *Fusarium graminearum*.  
779 *Plos One* 6: e28291  
780 Kanfi Y, Naiman S, Amir G, Peshti V, Zinman G, Nahum L, Bar-Joseph Z, Cohen HY (2012) The  
781 sirtuin SIRT6 regulates lifespan in male mice. *Nature* 483: 218-221  
782 Kawauchi M, Nishiura M, Iwashita K (2013) Fungus-specific sirtuin HstD coordinates secondary  
783 metabolism and development through control of LaeA. *Eukaryotic cell* 12: 1087-96  
784 Kim SC, Sprung R, Chen Y, Xu Y, Ball H, Pei J, Cheng T, Kho Y, Xiao H, Xiao L, Grishin NV, White M,  
785 Yang XJ, Zhao Y (2006) Substrate and functional diversity of lysine acetylation revealed by a  
786 proteomics survey. *Mol Cell* 23: 607-18  
787 Kwon OK, Kim SJ, Lee S (2018) First profiling of lysine crotonylation of myofilament proteins and  
788 ribosomal proteins in zebrafish embryos. *Sci Rep* 8: 3652  
789 Leroch M, Kleber A, Silva E, Coenen T, Koppenhöfer D, Shmaryahu A, Valenzuela PD, Hahn M  
790 (2013) Transcriptome profiling of *Botrytis cinerea* conidial germination reveals upregulation of  
791 infection-related genes during the prepenetration stage. *Eukaryotic cell* 12: 614-26  
792 Li Y, Sabari BR, Panchenko T, Wen H, Zhao D, Guan H, Wan L, Huang H, Tang Z, Zhao Y, Roeder  
793 RG, Shi X, Allis CD, Li H (2016) Molecular Coupling of Histone Crotonylation and Active  
794 Transcription by AF9 YEATS Domain. *Mol Cell* 62: 181-193  
795 Liu S, Xue C, Fang Y, Chen G, Peng X, Zhou Y, Chen C, Liu G, Gu M, Wang K, Zhang W, Wu Y,  
796 Gong Z (2018) Global Involvement of Lysine Crotonylation in Protein Modification and  
797 Transcription Regulation in Rice. *Molecular & cellular proteomics : MCP* 17: 1922-1936  
798 Liu S, Yu H, Liu Y, Liu X, Zhang Y, Bu C, Yuan S, Chen Z, Xie G, Li W (2017) Chromodomain protein  
799 CDYL acts as a crotonyl-CoA hydratase to regulate histone crotonylation and spermatogenesis.  
800 *Molecular Cell* 67: 853-866. e5  
801 Liu Z, Jian Y, Chen Y, Kistler HC, He P, Ma Z, Yin Y (2019) A phosphorylated transcription factor  
802 regulates sterol biosynthesis in *Fusarium graminearum*. *Nat Commun* 10: 1228  
803 Lombard DB, Alt FW, Cheng HL, Bunkenborg J, Streeper RS, Mostoslavsky R, Kim J, Yancopoulos  
804 G, Valenzuela D, Murphy A, Yang Y, Chen Y, Hirschev MD, Bronson RT, Haigis M, Guarente LP,  
805 Farese RV, Jr., Weissman S, Verdin E, Schwer B (2007) Mammalian Sir2 homolog SIRT3 regulates  
806 global mitochondrial lysine acetylation. *Mol Cell Biol* 27: 8807-14  
807 Mathias RA, Greco TM, Oberstein A, Budayeva HG, Chakrabarti R, Rowland EA, Kang Y, Shenk T,  
808 Cristea IM (2014) Sirtuin 4 is a lipoamidase regulating pyruvate dehydrogenase complex activity.  
809 *Cell* 159: 1615-25  
810 Michielse CB, Rep M (2009) Pathogen profile update: *Fusarium oxysporum*. *Molecular Plant*  
811 *Pathology* 10: 311-324  
812 Michishita E, Park JY, Burneskis JM, Barrett JC, Horikawa I (2005) Evolutionarily conserved and  
813 nonconserved cellular localizations and functions of human SIRT proteins. *Molecular biology of*

814 *the cell* 16: 4623-35

815 North BJ, Verdin E (2004) Sirtuins: Sir2-related NAD-dependent protein deacetylases. *Genome*

816 *biology* 5: 224

817 Nucci M, Anaissie E (2007) Fusarium infections in immunocompromised patients. *Clinical*

818 *microbiology reviews* 20: 695-704

819 Park J, Chen Y, Tishkoff DX, Peng C, Tan M, Dai L, Xie Z, Zhang Y, Zwaans BM, Skinner ME,

820 Lombard DB, Zhao Y (2013) SIRT5-mediated lysine desuccinylation impacts diverse metabolic

821 pathways. *Mol Cell* 50: 919-30

822 Qi Z, Liu M, Dong Y, Zhu Q, Li L, Li B, Yang J, Li Y, Ru Y, Zhang H, Zheng X, Wang P, Zhang Z

823 (2016) The syntaxin protein (MoSyn8) mediates intracellular trafficking to regulate conidiogenesis

824 and pathogenicity of rice blast fungus. *The New phytologist* 209: 1655-67

825 Rardin MJ, He W, Nishida Y, Newman JC, Carrico C, Danielson SR, Guo A, Gut P, Sahu AK, Li B

826 (2013) SIRT5 regulates the mitochondrial lysine succinylome and metabolic networks. *Cell*

827 *metabolism* 18: 920-933

828 Rodenburg SYA, Terhem RB, Veloso J, Stassen JHM, van Kan JAL (2018) Functional Analysis of

829 Mating Type Genes and Transcriptome Analysis during Fruiting Body Development of *Botrytis*

830 *cinerea*. *MBio* 9

831 Ryan MT (2018) Mitochondria - The energy powerhouses. *Semin Cell Dev Biol* 76: 130-131

832 Sabari BR, Tang Z, Huang H, Yong-Gonzalez V, Molina H, Kong HE, Dai L, Shimada M, Cross JR,

833 Zhao Y, Roeder RG, Allis CD (2015) Intracellular crotonyl-CoA stimulates transcription through

834 p300-catalyzed histone cronylation. *Mol Cell* 58: 203-15

835 Sharma M, Sengupta A, Ghosh R, Agarwal G, Tarafdar A, Nagavardhini A, Pande S, Varshney RK

836 (2016) Genome wide transcriptome profiling of *Fusarium oxysporum* f sp. *ciceris* conidial

837 germination reveals new insights into infection-related genes. *Sci Rep* 6: 37353

838 Smith KM, Kothe GO, Matsen CB, Khlafallah TK, Adhvaryu KK, Hemphill M, Freitag M, Motamedi

839 MR, Selker EU (2008) The fungus *Neurospora crassa* displays telomeric silencing mediated by

840 multiple sirtuins and by methylation of histone H3 lysine 9. *Epigenetics & chromatin* 1: 5

841 Sun CF, Xu WF, Zhao QW, Luo S, Chen XA, Li YQ, Mao XM (2020) Cronylation of key metabolic

842 enzymes regulates carbon catabolite repression in *Streptomyces roseosporus*. *Communications*

843 *biology* 3: 192

844 Sun H, Liu X, Li F, Li W, Zhang J, Xiao Z, Shen L, Li Y, Wang F, Yang J (2017) First comprehensive

845 proteome analysis of lysine cronylation in seedling leaves of *Nicotiana tabacum*. *Sci Rep* 7: 3013

846 Sun J, Qiu C, Qian W, Wang Y, Sun L, Li Y, Ding Z (2019) Ammonium triggered the response

847 mechanism of lysine cronylation in tea plants. *BMC genomics* 20: 340

848 Tan M, Luo H, Lee S, Jin F, Yang JS, Montellier E, Buchou T, Cheng Z, Rousseaux S, Rajagopal N

849 (2011a) Identification of 67 histone marks and histone lysine cronylation as a new type of

850 histone modification. *Cell* 146: 1016-1028

851 Tan M, Luo H, Lee S, Jin F, Yang JS, Montellier E, Buchou T, Cheng Z, Rousseaux S, Rajagopal N,

852 Lu Z, Ye Z, Zhu Q, Wysocka J, Ye Y, Khochbin S, Ren B, Zhao Y (2011b) Identification of 67 histone

853 marks and histone lysine cronylation as a new type of histone modification. *Cell* 146: 1016-28

854 Tan M, Peng C, Anderson KA, Chhoy P, Xie Z, Dai L, Park J, Chen Y, Huang H, Zhang Y (2014a)

855 Lysine glutarylation is a protein posttranslational modification regulated by SIRT5. *Cell*

856 *metabolism* 19: 605-617

857 Tan M, Peng C, Anderson KA, Chhoy P, Xie Z, Dai L, Park J, Chen Y, Huang H, Zhang Y, Ro J,

858 Wagner GR, Green MF, Madsen AS, Schmiesing J, Peterson BS, Xu G, Ilkayeva OR, Muehlbauer MJ,  
859 Bräulke T et al. (2014b) Lysine glutarylation is a protein posttranslational modification regulated  
860 by SIRT5. *Cell Metab* 19: 605-17

861 Tang G, Chen A, Dawood DH, Liang J, Chen Y, Ma Z (2020) Capping proteins regulate fungal  
862 development, DON-toxisome formation and virulence in *Fusarium graminearum*. *Mol Plant*  
863 *Pathol* 21: 173-187

864 Vaquero A, Scher MB, Lee DH, Sutton A, Cheng HL, Alt FW, Serrano L, Sternglanz R, Reinberg D  
865 (2006) SirT2 is a histone deacetylase with preference for histone H4 Lys 16 during mitosis. *Genes*  
866 *Dev* 20: 1256-61

867 Wan J, Liu H, Chu J, Zhang H (2019) Functions and mechanisms of lysine crotonylation. *Journal of*  
868 *cellular and molecular medicine* 23: 7163-7169

869 Wang J, Mei H, Zheng C, Qian H, Cui C, Fu Y, Su J, Liu Z, Yu Z, He J (2013) The metabolic  
870 regulation of sporulation and parasporal crystal formation in *Bacillus thuringiensis* revealed by  
871 transcriptomics and proteomics. *Molecular & cellular proteomics : MCP* 12: 1363-76

872 Wang JJ, Cai Q, Qiu L, Ying SH, Feng MG (2018) The histone acetyltransferase Mst2 sustains the  
873 biological control potential of a fungal insect pathogen through transcriptional regulation.  
874 *Applied microbiology and biotechnology* 102: 1343-1355

875 Wei W, Liu X, Chen J, Gao S, Lu L, Zhang H, Ding G, Wang Z, Chen Z, Shi T (2017a) Class I histone  
876 deacetylases are major histone decrotonylases: evidence for critical and broad function of histone  
877 crotonylation in transcription. *Cell research* 27: 898-915

878 Wei W, Mao A, Tang B, Zeng Q, Gao S, Liu X, Lu L, Li W, Du JX, Li J (2017b) Large-scale  
879 identification of protein crotonylation reveals its role in multiple cellular functions. *Journal of*  
880 *proteome research* 16: 1743-1752

881 Wu Q, Li W, Wang C, Fan P, Cao L, Wu Z, Wang F (2017) Ultradeep lysine Crotonylome reveals  
882 the Crotonylation enhancement on both histones and nonhistone proteins by SAHA treatment.  
883 *Journal of proteome research* 16: 3664-3671

884 Xiong X, Panchenko T, Yang S, Zhao S, Yan P, Zhang W, Xie W, Li Y, Zhao Y, Allis CD, Li H (2016)  
885 Selective recognition of histone crotonylation by double PHD fingers of MOZ and DPF2. *Nat*  
886 *Chem Biol* 12: 1111-1118

887 Xu W, Wan J, Zhan J, Li X, He H, Shi Z, Zhang H (2017) Global profiling of crotonylation on  
888 non-histone proteins. *Cell research* 27: 946-949

889 Yu H, Bu C, Liu Y, Gong T, Liu X, Liu S, Peng X, Zhang W, Peng Y, Yang J, He L, Zhang Y, Yi X, Yang  
890 X, Sun L, Shang Y, Cheng Z, Liang J (2020) Global crotonylome reveals CDYL-regulated RPA1  
891 crotonylation in homologous recombination-mediated DNA repair. *Science advances* 6:  
892 eaay4697

893 Yuan M, Huang Y, Ge W, Jia Z, Song S, Zhang L (2019) Involvement of jasmonic acid, ethylene  
894 and salicylic acid signaling pathways behind the systemic resistance induced by *Trichoderma*  
895 *longibrachiatum* H9 in cucumber. *BMC genomics* 20: 144

896 Zhang N, Yang Z, Liang W, Liu M (2020a) Global Proteomic Analysis of Lysine Crotonylation in the  
897 Plant Pathogen *Botrytis cinerea*. *Front Microbiol* 11: 564350

898 Zhang N, Yang Z, Zhang Z, Liang W (2020b) BcRPD3-Mediated Histone Deacetylation Is Involved  
899 in Growth and Pathogenicity of *Botrytis cinerea*. *Front Microbiol* 11: 1832

900 Zhao D, Guan H, Zhao S, Mi W, Wen H, Li Y, Zhao Y, Allis CD, Shi X, Li H (2016) YEATS2 is a  
901 selective histone crotonylation reader. *Cell Res* 26: 629-32

902 **Figure legends:**

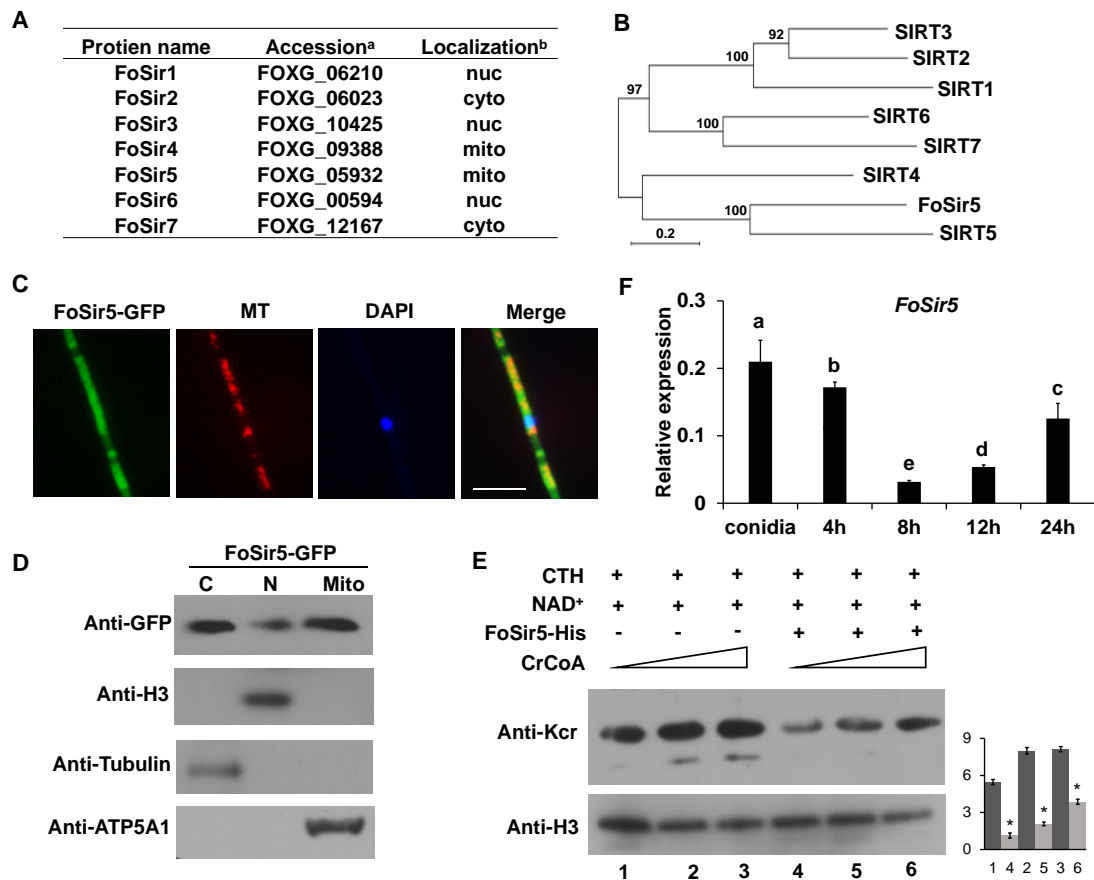

903

904 **Figure 1.** Cellular localization and activity of FoSir5 in *F. oxysporum*. **(A)** Sirtuin  
905 proteins in *F. oxysporum* with predicted subcellular localizations. <sup>a</sup> Accession number  
906 of the full-length protein sequence available at Ensembl. <sup>b</sup> Localization of the *F.*  
907 *oxysporum* Sir2 protein determined by WoLF PSORT. **(B)** Phylogenetic tree relating  
908 FoSir5 to the orthologous human Sirtuin isoforms SIRT1 (NP\_036370), SIRT2  
909 (NP\_085096), SIRT3 (NP\_001357239), SIRT4 (NP\_036372), SIRT5  
910 (NP\_001363737), SIRT6 (NP\_057623), and SIRT7 (NP\_057622). The tree is based  
911 on neighbour-joining analysis using MEGA-X. **(C)** Fluorescence microscopy analysis  
912 of FoSir5-GFP localization with MitoTracker Red (MT) and DAPI. Scale bars = 10  
913 μm. **(D)** Subcellular fractionation of FoSir5-GFP transformants in *F. oxysporum*.

914 Nuclear, cytoplasmic, and mitochondrial proteins were separately extracted and  
915 FoSir5-GFP were detected with anti-GFP antibody (Materials and Methods). The  
916 fractionation controls were ATP5A1 (mitochondria), Tubulin (cytosol), and histone  
917 H3 (nucleus). C, cytosol; N, nucleus; Mito, mitochondria. **(E)** *In vitro* Kcr assays with  
918 50 µg of native CTH, 5 mM NAD<sup>+</sup> and 0.5 µg of FoSir5-His in the presence of 50,  
919 100, or 200 µM crotonyl-CoA. Reaction materials were analyzed by Western blotting  
920 with anti-Kcr or anti-H3 antibody. Each scale bar represents the mean ± SD for  
921 triplicate experiments. \*indicates a significant difference between different pairs of  
922 samples (P < 0.05). **(F)** Expression profile of *FoSir5* in conidia, mycelium and during  
923 the germination process. The expression levels were normalized to that of the *F.*  
924 *oxysporum* elongation factor 1 alpha (EF-1α) gene. The presence of different letters  
925 above the mean values of three replicates indicates a significant difference between  
926 different samples (P < 0.05, ANOVA).

927

928

929

930

931

932

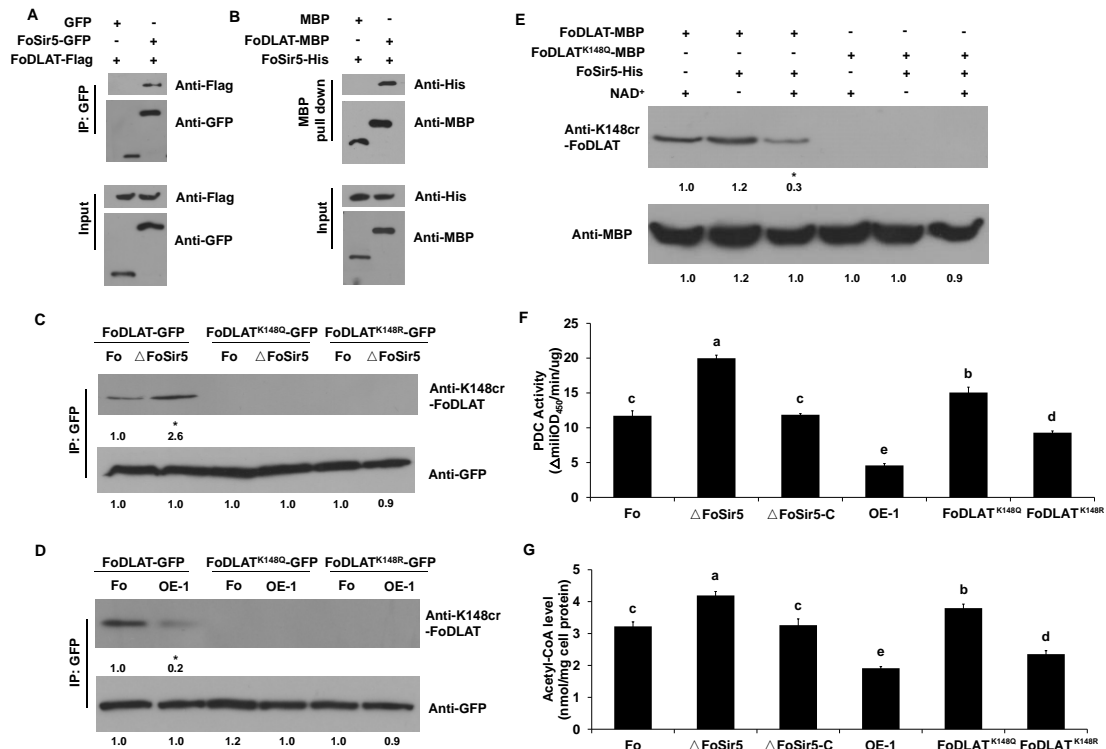

933

934 **Figure 2.** FoSir5 deacetylates FoDLAT, the E2 component of *F. oxysporum*  
 935 pyruvate decarboxylase complex, with regulatory consequence. (A) Co-IP assays  
 936 reveal physical interaction of FoSir5-GFP and FoDLAT-Flag. Western blot analysis of  
 937 cell extracts from transformants co-expressing FoDLAT-Flag with GFP or  
 938 FoSir5-GFP and elution from anti-GFP agarose. The fusion proteins were detected  
 939 with anti-Flag or anti-GFP antibody. (B) *In vitro* pull-down assays to detect  
 940 FoSir5-His with MBP or the FoDLAT-MBP fusion protein. FoDLAT-MBP was used  
 941 as bait to pull down the FoSir5-His protein from the induced cell extracts. The MBP  
 942 protein was assayed as a negative control. Input and bound forms of the pull-down  
 943 fractions were detected with anti-His or anti-MBP antibody. (C-D) The K148  
 944 cronylation (anti-K148cr-FoDLAT, top panel) and amount (anti-GFP, bottom panel)  
 945 of FoDLAT-GFP and its mutant isoforms in the  $\Delta$ FoSir5 (C) and OE-1 strain (D).



946 Proteins were immunoprecipitated with anti-GFP antibody agarose beads and  
947 analyzed by anti-K148cr-FoDLAT or anti-GFP antibody. Representative gels are  
948 shown from experiments carried out at least twice. Numbers below the blots represent  
949 the relative abundance of K148-crotonylated FoDLAT. Anti-GFP immunoblotting was  
950 used to show equal loading. **(E)** FoSir5 directly decrotonylates FoDLAT *in vitro*.  
951 Purified FoDLAT protein or its K148Q isoform (50 ng) were incubated with or  
952 without 50 ng of purified FoSir5 in the absence or presence of 5 mM NAD<sup>+</sup> and then  
953 analyzed by immunoblotting using anti-K148cr-FoDLAT or anti-His antibody. Each  
954 gel shown is representative of two experiments. Numbers below the blots represent  
955 the relative abundance of K148-crotonylated FoDLAT. Anti-MBP immunoblotting  
956 was used to show equal loading. **(F-G)** FoSir5 and K148 mutant FoDLAT affected  
957 PDC activity (F) and acetyl-CoA production (G) in *F. oxysporum*. PDC activity and  
958 acetyl-CoA production were determined in germinating conidia at 8 h. The presence  
959 of different letters above the mean values of three replicates indicates a significant  
960 difference between different strains ( $P < 0.05$ , ANOVA).

961

962

963

964

965

966

967

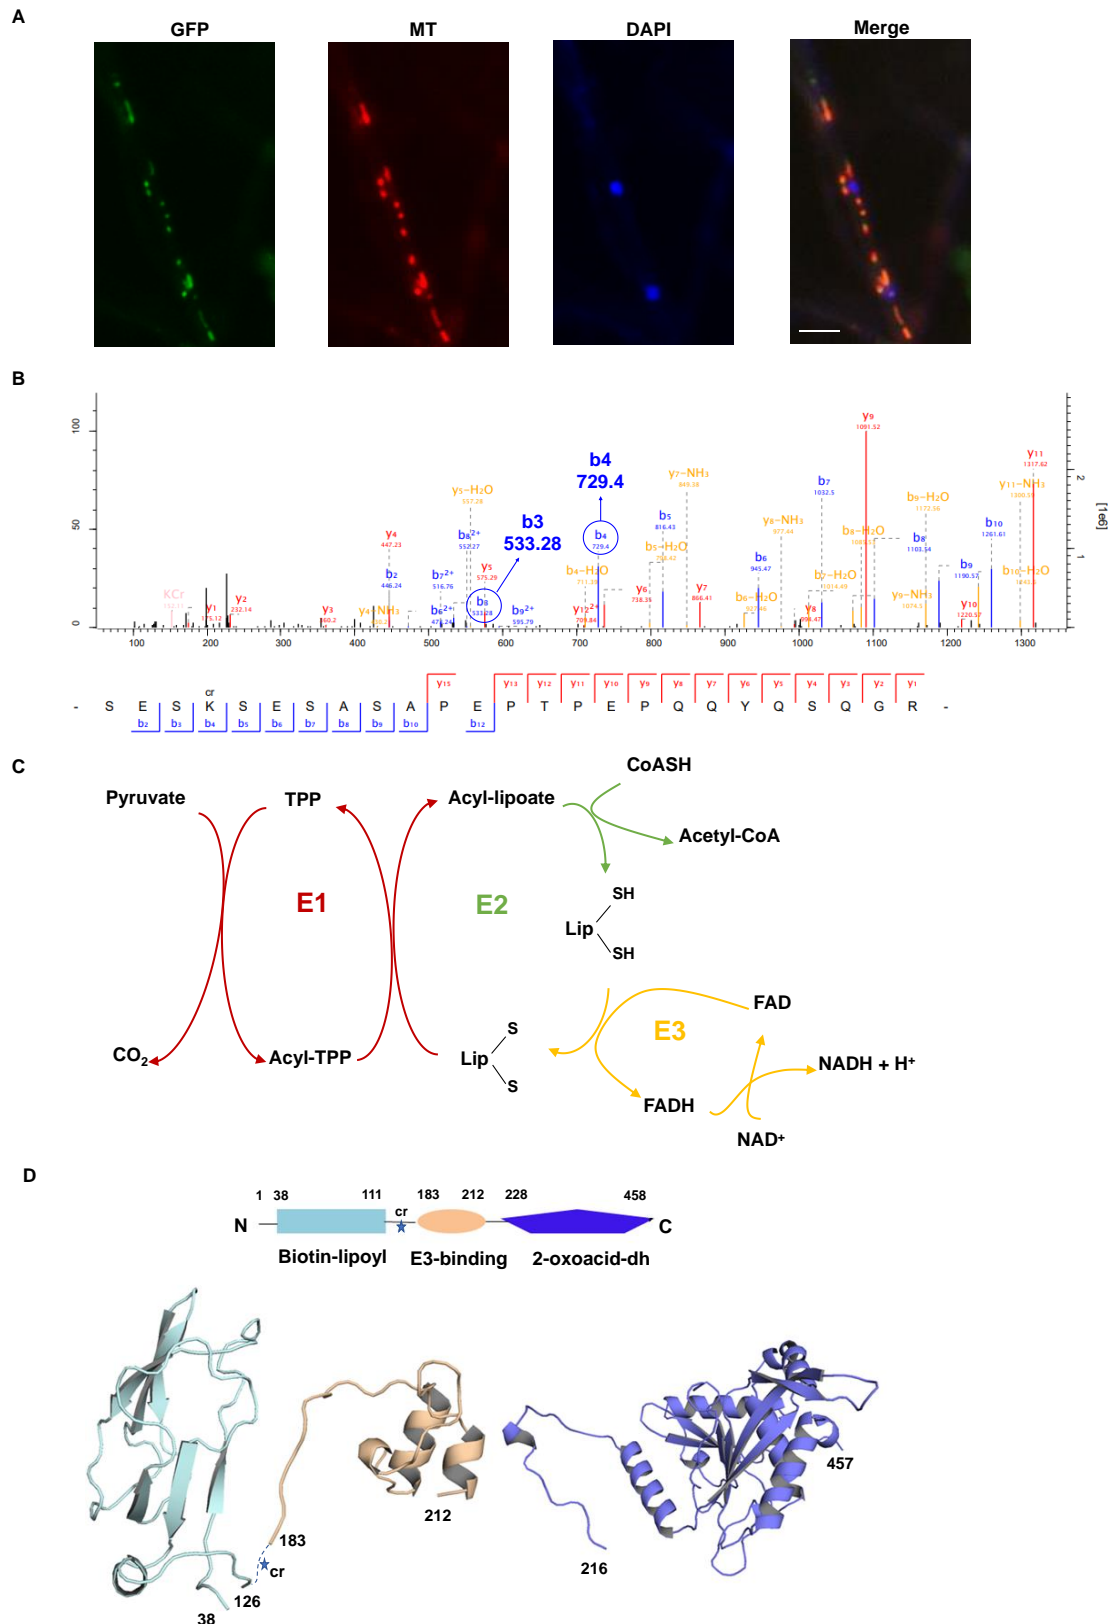

968

969 **Figure 2-figure supplement 1.** Interpretation of the subcellular location, Kcr site and

970 protein structure of FoDLAT. (A) Fluorescence microscopy analysis of the

971 FoDLAT-GFP localization along with MitoTracker Red (MT) and DAPI. Scale bars =  
972 10  $\mu$ m. **(B)** Annotation of representative tandem mass spectra from trypsin-digested  
973 FoDLAT-GFP in *F. oxysporum* depicting K148 crotonylation. **(C)** Schematic of the  
974 chemical transformations catalysed by the E1 and E3 subunits of pyruvate  
975 dehydrogenase. **(D)** Homology models of the FoDLAT domains predicted by the  
976 PHYRE fold server. FoDALT domain boundary is defined using Motif program to  
977 against Pfam, NCBI-CDD database. The star indicates the K148 crotonylation site.

978

979

980

981

982

983

984

985

986

987

988

989

990

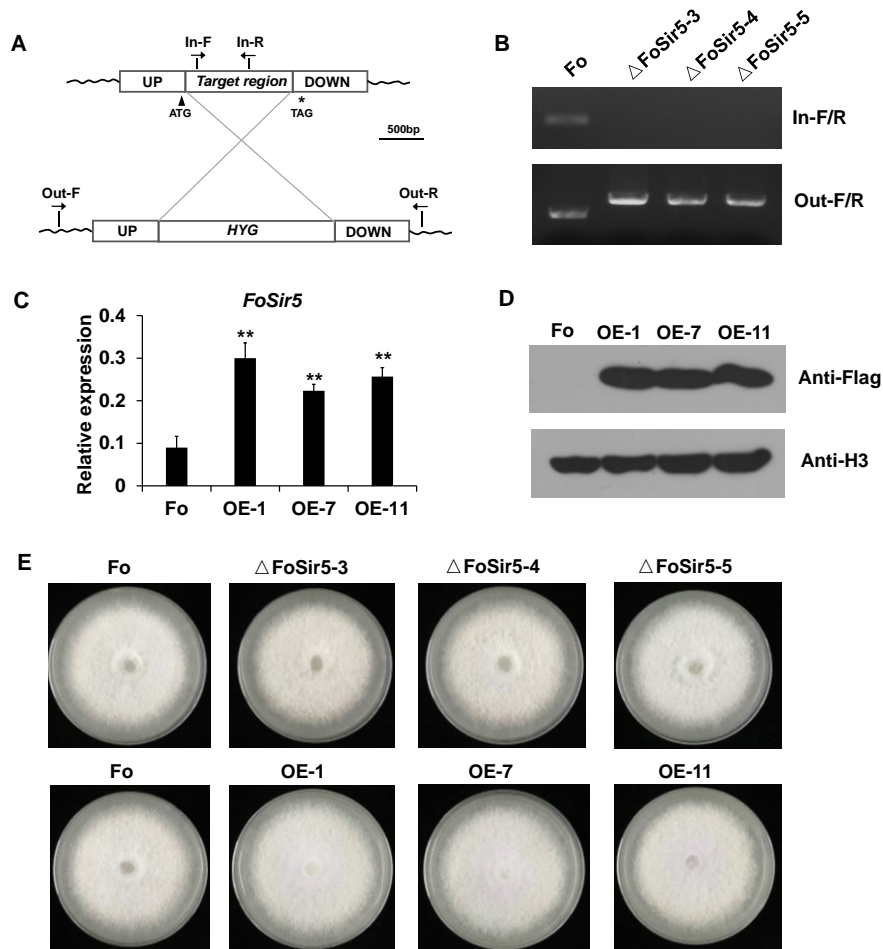

991

992 **Figure 2-figure supplement 2.** Generation of targeted *FoSir5* gene deletion mutants

993 and overexpression transformants. **(A)** Schematic representation of the targeted

994 deletion of *FoSir5*. **(B)** PCR analysis of targeted deletion in the  $\Delta$ *FoSir5* strains.

995 Genomic DNA was analyzed by PCR with the primer pairs indicated in panel **(A)**.

996 **(C-D)** RT-PCR **(C)** and WB **(D)** analysis of the *FoSir5*-Flag-overexpression

997 transformants. Data of RT-PCR are the means  $\pm$  SDs (n = 3); \*\*P < 0.05 by unpaired

998 two-tailed t-test. **(E)** Mycelial growth of the indicated strains on PDA plates after 3

999 days of cultivation.

1000

1001

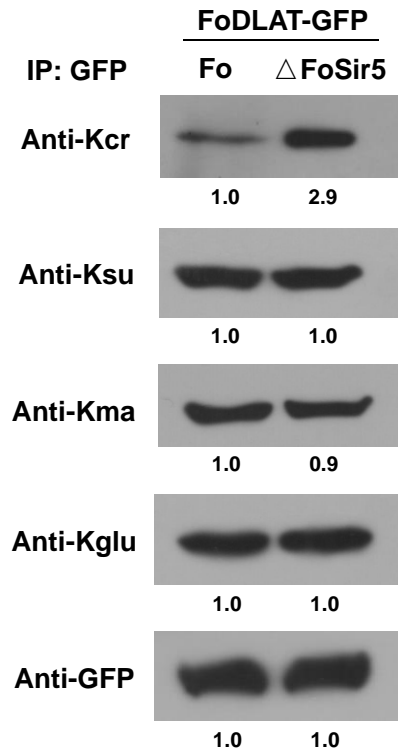

1002

1003 **Figure 2-figure supplement 3.** Detection of crotonylation, succinylation,  
1004 malonylation, and glutarylation on FoDLAT protein in  $\Delta$ FoSir5 compared with Fo.  
1005 Proteins were immunoprecipitated with anti-GFP antibody agarose beads and  
1006 analyzed by Western blot using the indicated antibodies. Representative gels are  
1007 shown from experiments carried out at least twice. Anti-GFP immunoblotting was  
1008 used to show equal loading.

1009

1010

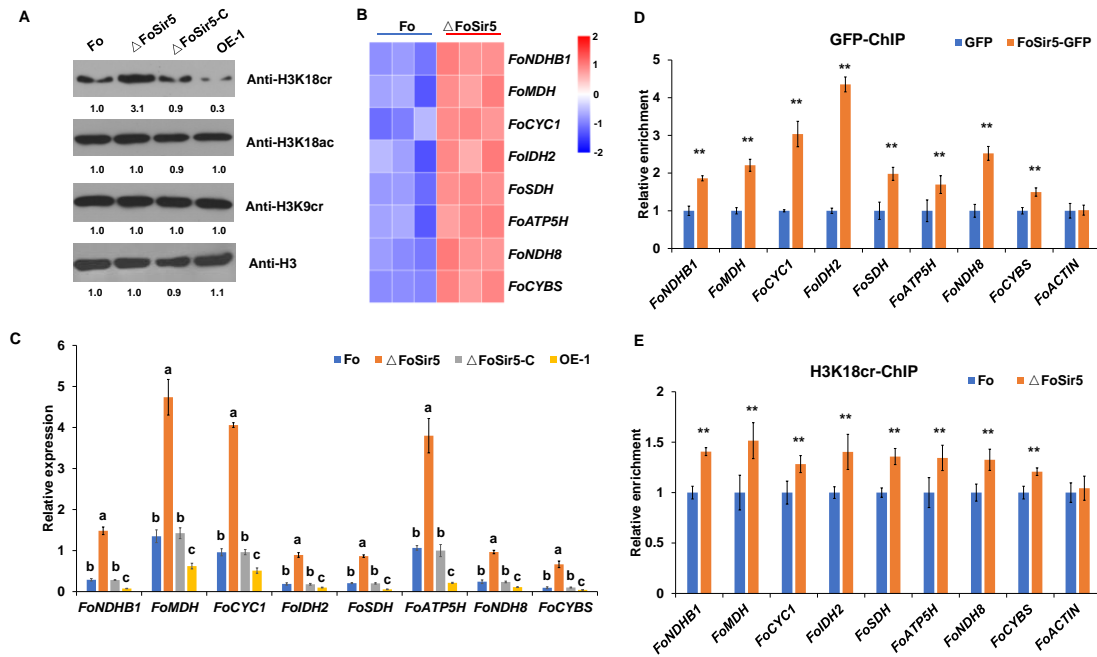

1011

1012 **Figure 3.** The downregulation of H3K18 crotonylation by FoSir5 and transcriptional

1013 repression of aerobic respiration-related genes. **(A)** Western blot analysis showed the

1014 effect of FoSir5 on histone H3K18 crotonylation and acetylation, and histone H3K9

1015 crotonylation using the indicated antibodies. Numbers below the blots represent the

1016 relative abundance of different modifications. Anti-H3 immunoblotting was used to

1017 show equal loading. **(B)** RNA-seq analysis of 8 upregulated genes involved in

1018 aerobic respiration including *NDHB1* (NADH-quinone oxidoreductase chain B 1),

1019 *MDH* (malate dehydrogenase), *CYC1* (cytochrome C1), *IDH2* (isocitrate

1020 dehydrogenase subunit 2), *SDH* (succinate dehydrogenase), *ATP5H* (ATP synthase D

1021 chain), *NDH8* (NADH dehydrogenase iron-sulfur protein 8), and *CYBS* (succinate

1022 dehydrogenase cytochrome b small subunit). Differential expression in three

1023 biological replicates illustrated using a heat map with coloured squares indicating the

1024 range of expression referred to as the FPKM value. **(C)** qRT-PCR validation of

1025 aerobic respiration-related genes in the indicated strains. The letters above the mean  
1026 values of three replicates indicate significant differences between different strains ( $P <$   
1027  $0.05$ , ANOVA). **(D-E)** Relative enrichment of the immunoprecipitated promoter  
1028 regions in aerobic respiration-related genes determined using anti-GFP antibody in the  
1029 FoSir5-GFP strain and Fo strain containing GFP alone (D) or using anti-H3K18cr  
1030 antibody in the Fo and  $\Delta$ FoSir5 mutant strains (E). The fold enrichment was  
1031 normalized to the input and internal control gene ( *$\beta$ -tubulin*). Data are the means  $\pm$   
1032 SDs ( $n = 3$ );  $**P < 0.05$  by unpaired two-tailed t-test.

1033

1034

1035

1036

1037

1038

1039

1040

1041

1042

1043

1044

1045

1046

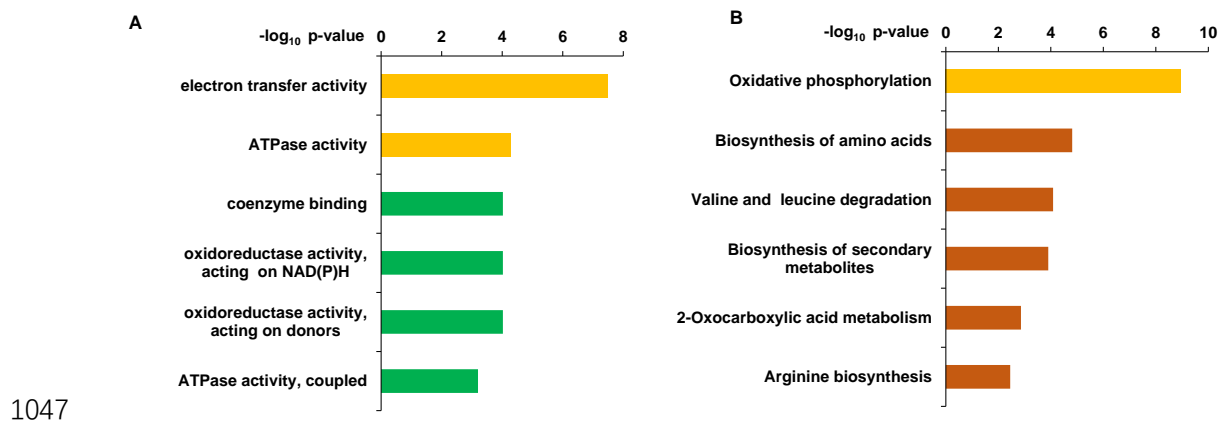

1047

1048 **Figure 3-figure supplement 1.** Distribution of functional classification of GO (A)

1049 and KEGG pathway (B) of the upregulated genes in  $\Delta$ FoSir5 compared with Fo.

1050 Histograms indicate P-values of the enriched functional categories.

1051

1052

1053

1054

1055

1056



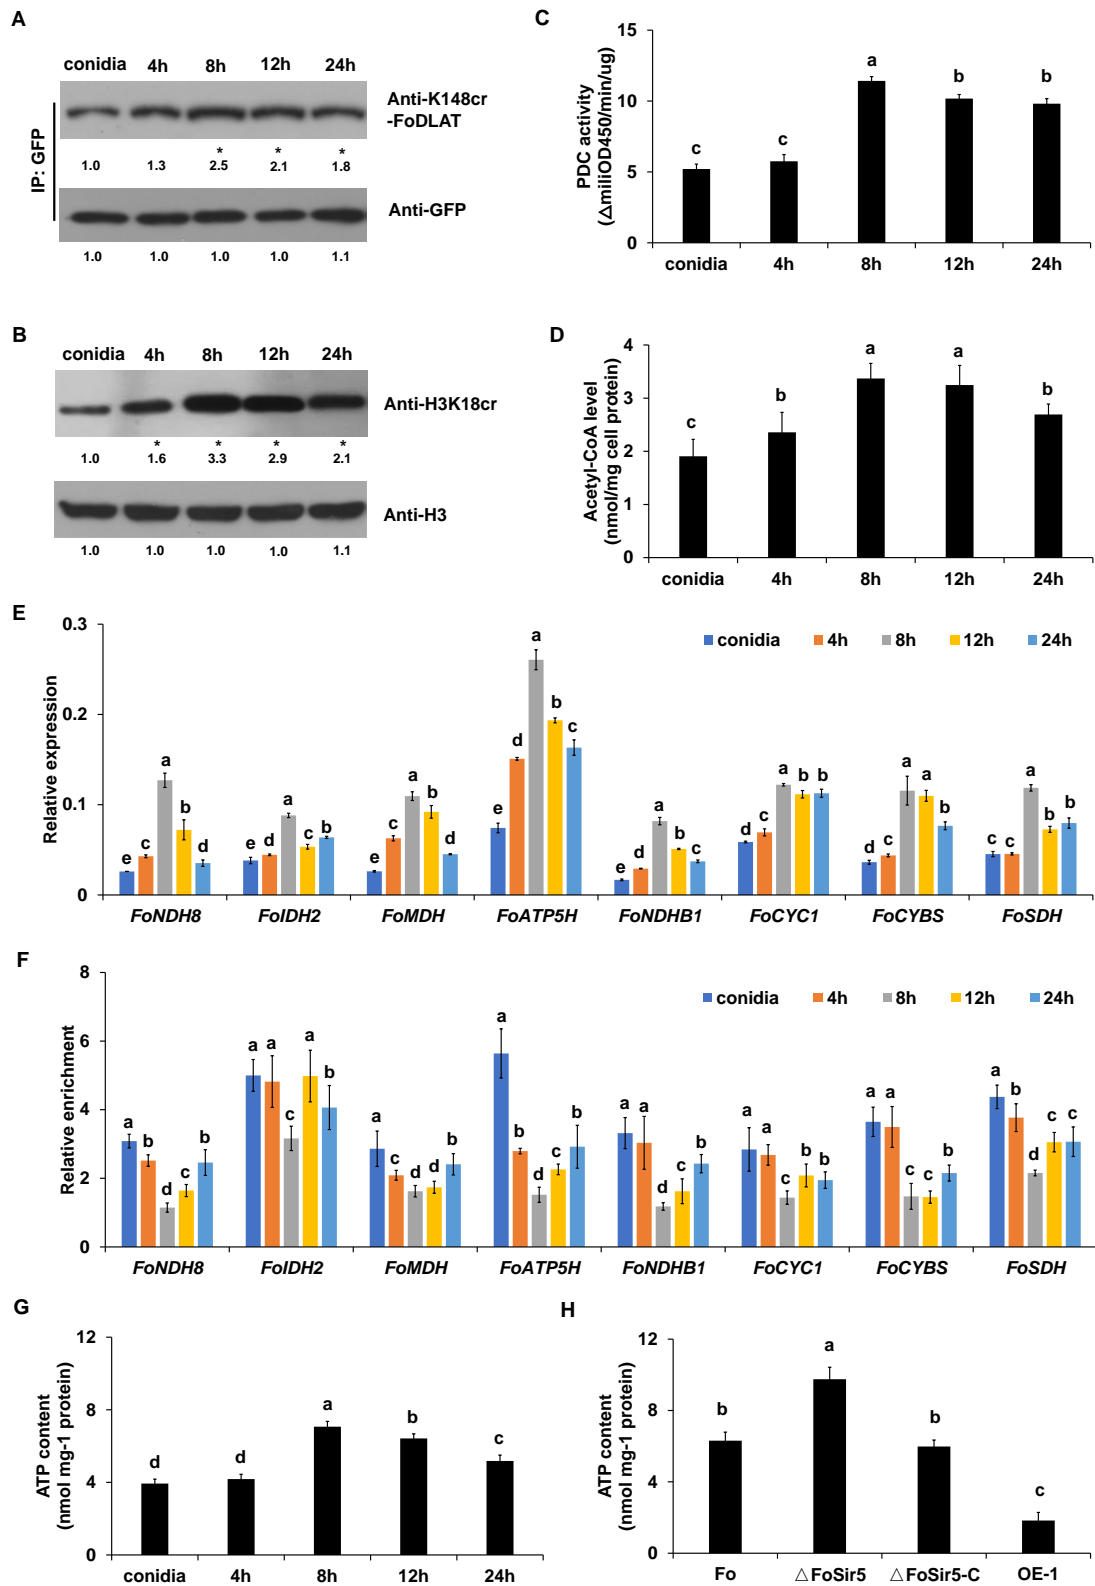

1057

1058 **Figure 4.** FoSir5 affects ATP production during gemination in *F. oxysporum*. (A-B)

1059 Western blot analysis showed the dynamic changes of FoDLAT K148 (A) and histone

1060 H3K18 (B) crotonylation during germination using the indicated antibodies. Numbers  
1061 below the blots represent the relative abundance of FoDLAT-K148cr or H3K18cr.  
1062 Anti-GFP or anti-H3 immunoblotting was used to show equal loading, respectively.  
1063 **(C-D)** PDC activity (C) and acetyl-CoA production (D) in *F. oxysporum* during  
1064 germination were determined. **(E)** Expression profile of the aerobic respiration-related  
1065 genes during the germination process. **(F)** Relative enrichment of the  
1066 immunoprecipitated promoter regions in aerobic respiration-related genes during  
1067 germination determined using anti-GFP antibody in the FoSir5-GFP strain driven by  
1068 the native promoter. The fold enrichment was normalized to the input and internal  
1069 control gene (*β-tubulin*). **(G)** ATP content of *F. oxysporum* during germination. **(H)**  
1070 Effect of FoSir5 on the ATP content of the indicated strains, as determined in  
1071 germinating conidia at 8 h post incubation (h.p.r.). The presence of different letters  
1072 (A-H) above the mean values of three replicates indicates a significant difference  
1073 between different samples ( $P < 0.05$ , ANOVA).

1074

1075

1076

1077

1078

1079

1080

1081

1082

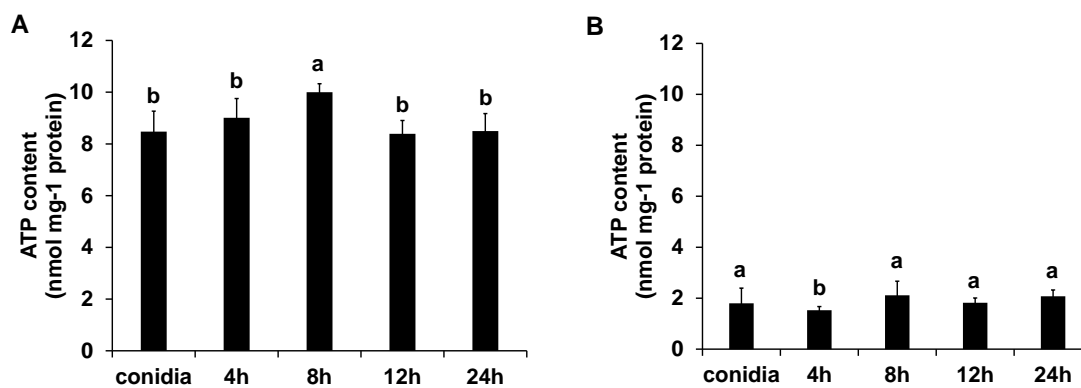

1083

1084 **Figure 4-figure supplement 1.** The ATP content of  $\Delta$ FoSir5 mutant (A) and OE-1  
1085 strain (B) during germinating process. The presence of different letters above the  
1086 mean values of three replicates indicates a significant difference between different  
1087 samples ( $P < 0.05$ , ANOVA).

1088

1089

1090

1091

1092

1093

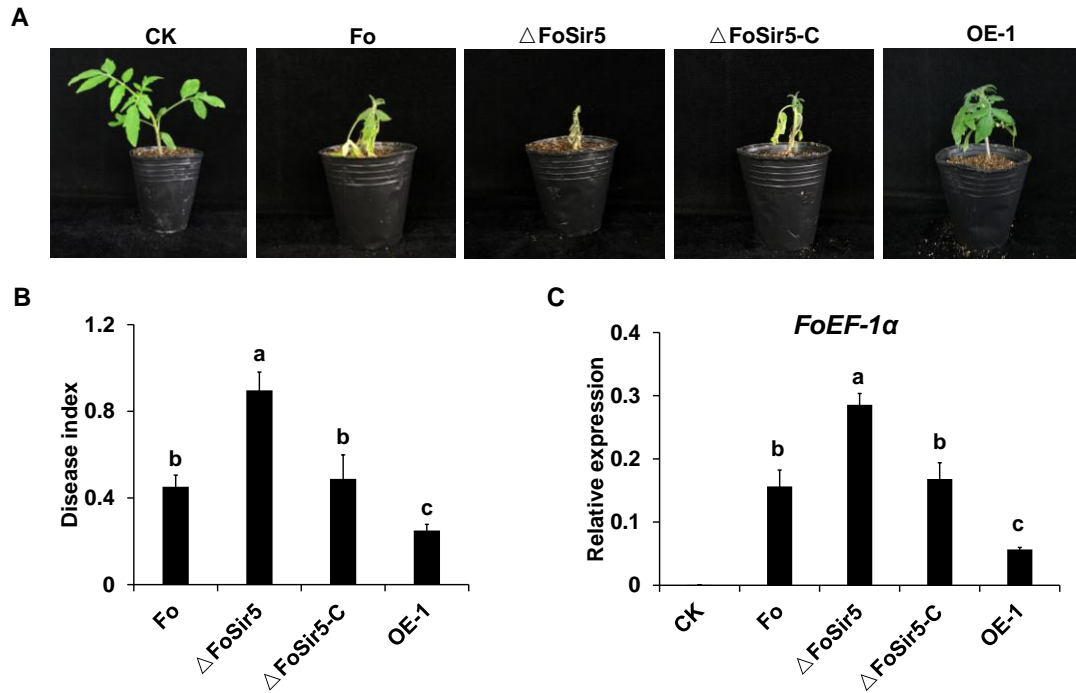

1094

1095 **Figure 4-figure supplement 2.** Impact of FoSir5 on the virulence of *F. oxysporum*.

1096 (A) Pathogenicity of the indicated strains in tomato after 8 days of incubation. (B)

1097 Quantification of the disease indexes of the indicated strains. (C) qRT-PCR analysis

1098 of *F. oxysporum EF-1 $\alpha$*  transcript levels in tomato plants harvested 14 days after

1099 infection with the indicated strains. The expression of tomato *RCE1*, a constitutively

1100 expressed gene, was used as a control for the use of equal amounts of RNA for

1101 RT-PCR. The letters (B and C) above the mean values of three replicates indicate

1102 significant differences between different strains ( $P < 0.05$ , ANOVA).

1103

1104

1105

1106

1107

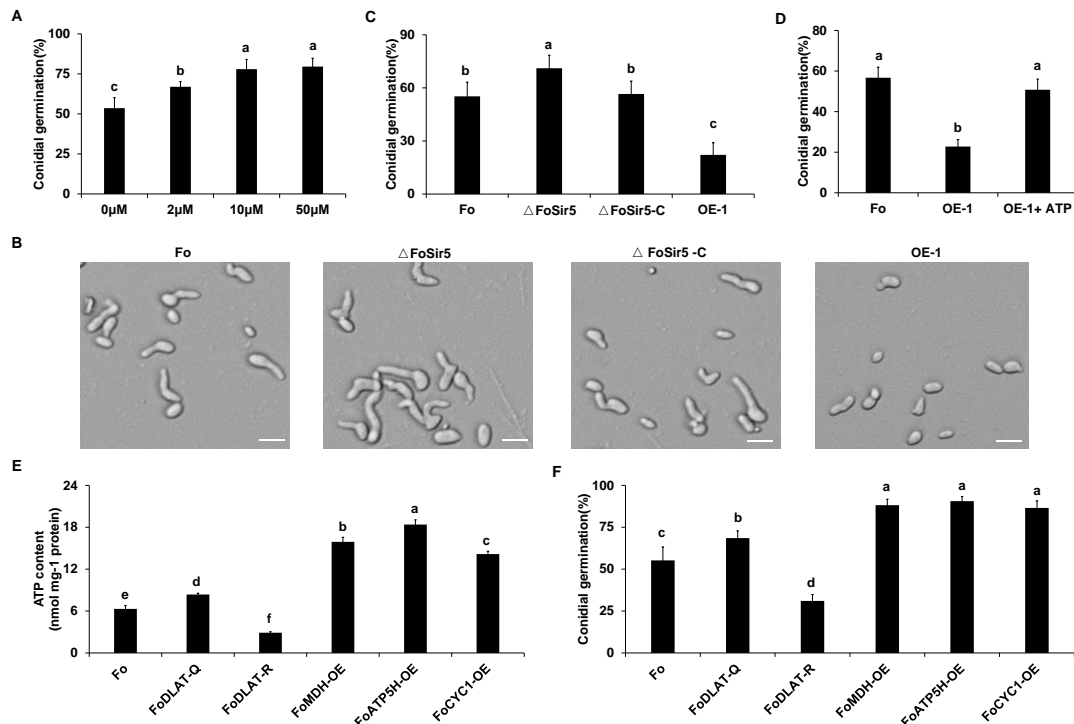

1108

1109 **Figure 5.** FoSir5 modulates conidial germination through affecting ATP synthesis. (A)

1110 Quantification of the conidial germination of *F. oxysporum* in PDB supplied with

1111 different concentrations of exogenous ATP at 8 h.p.r. (B) Conidial germination of the

1112 indicated strains in PDB on glass slides at 8 h.p.r. Representative images from three or

1113 more independent experiments, all of which had similar results. Scale bars = 30 μm.

1114 (C) Quantification of the conidial germination of the indicated strains in PDB on

1115 glass slides at 8 h.p.r. (D) Quantification of the conidial germination of the OE-1

1116 strain with or without treatment with exogenous ATP at 8 h.p.r. (E-F) Effect of

1117 FoDLAT -K148Q/R mutations or overexpression of key genes of aerobic respiration

1118 on ATP production (E) and conidial germination (F) in *F. oxysporum*. The ATP content

1119 and germinating rate were determined at 8 h.p.r. The letters (A-F) above the mean

1120 values of three replicates indicate significant differences between different strains ( $P <$

1121 0.05, ANOVA).

1122

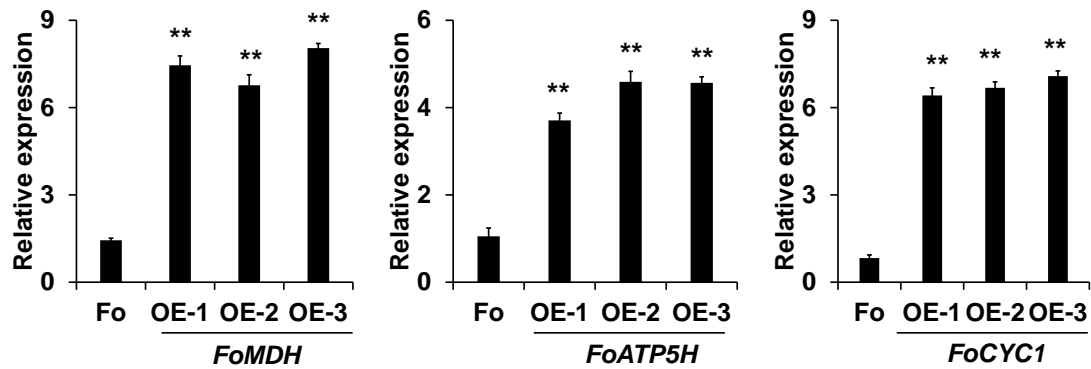

1123

1124 **Figure 5-figure supplement 1.** RT-PCR analysis of *FoMDH*-, *FoATP5H*-, and

1125 *FoCYC1*-overexpressing transformants. Data are the means  $\pm$  SDs (n = 3); \*\*P < 0.05

1126 by unpaired two-tailed t-test.

1127

1128

1129

1130

1131

1132

1133

1134

1135

1136

1137

1138

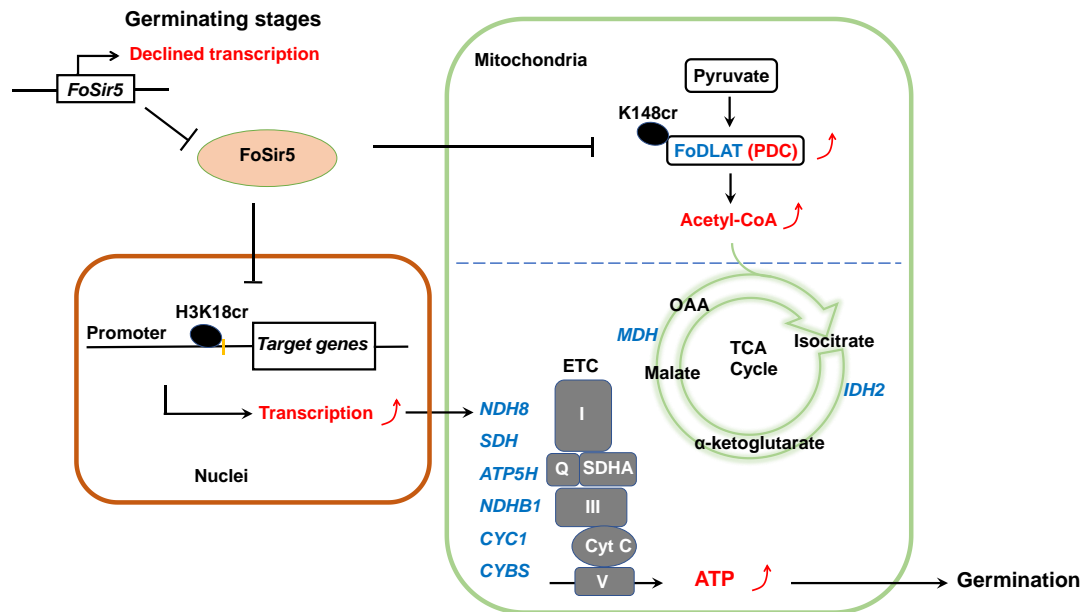

1139

1140 **Figure 6.** A model for FoSir5 functioning as a decrotonylase in different organelles to  
1141 regulate conidial germination. During the germination process, the expression of  
1142 *FoSir5* decreases, leading to relief of the inhibitory effect of FoSir5 on PDC activity  
1143 through the decrotonylation of FoDLAT-K148cr and transcription of aerobic  
1144 respiration-related genes by the reversal of H3K18cr. Thus, mitochondrial ATP  
1145 biosynthesis is enhanced, promoting conidial germination in *F. oxysporum*.

1146

1147

1148

1149

1150

1151

1152

1153

1154 **Supplementary File 1. Putative FoSir5 interacting proteins**

1155 **Supplementary File 2. RNA-seq gene expression data**

1156 **Supplementary File 3. Primers used in the study**

1157

1158 **Figure legends for source data:**

1159 **Figure 1- source data.** Cellular localization and activity of FoSir5 in *F. oxysporum*.

1160 **(A)** Sirtuin proteins in *F. oxysporum* with predicted subcellular localizations. <sup>a</sup>

1161 Accession number of the full-length protein sequence available at Ensembl. <sup>b</sup>

1162 Localization of the *F. oxysporum* Sir2 protein determined by WoLF PSORT. **(B)**

1163 Phylogenetic tree relating FoSir5 to the orthologous human Sirtuin isoforms SIRT1

1164 (NP\_036370), SIRT2 (NP\_085096), SIRT3 (NP\_001357239), SIRT4 (NP\_036372),

1165 SIRT5 (NP\_001363737), SIRT6 (NP\_057623), and SIRT7 (NP\_057622). The tree is

1166 based on neighbour-joining analysis using MEGA-X. **(C)** Fluorescence microscopy

1167 analysis of FoSir5-GFP localization with MitoTracker Red (MT) and DAPI. Scale

1168 bars = 10  $\mu$ m. **(D)** Subcellular fractionation of FoSir5-GFP transformants in *F.*

1169 *oxysporum*. Nuclear, cytoplasmic, and mitochondrial proteins were separately

1170 extracted and FoSir5-GFP were detected with anti-GFP antibody (Materials and

1171 Methods). The fractionation controls were ATP5A1 (mitochondria), Tubulin (cytosol),

1172 and histone H3 (nucleus). C, cytosol; N, nucleus; Mito, mitochondria. **(E)** *In vitro* Kcr

1173 assays with 50  $\mu$ g of native CTH, 5 mM NAD<sup>+</sup> and 0.5  $\mu$ g of FoSir5-His in the

1174 presence of 50, 100, or 200  $\mu$ M crotonyl-CoA. Reaction materials were analyzed by

1175 Western blotting with anti-Kcr or anti-H3 antibody. Each scale bar represents the



1176 mean  $\pm$  SD for triplicate experiments. \*indicates a significant difference between  
1177 different pairs of samples ( $P < 0.05$ ). **(F)** Expression profile of *FoSir5* in conidia,  
1178 mycelium and during the germination process. The expression levels were normalized  
1179 to that of the *F. oxysporum* elongation factor 1 alpha (EF-1 $\alpha$ ) gene. The presence of  
1180 different letters above the mean values of three replicates indicates a significant  
1181 difference between different samples ( $P < 0.05$ , ANOVA). (The red arrow indicates  
1182 the original SDS-PAGE gels that were cropped for this panel.)

1183

1184 **Figure 2- source data.** FoSir5 deacetylates FoDLAT, the E2 component of *F.*  
1185 *oxysporum* pyruvate decarboxylase complex, with regulatory consequence. **(A)** Co-IP  
1186 assays reveal physical interaction of FoSir5-GFP and FoDLAT-Flag. Western blot  
1187 analysis of cell extracts from transformants co-expressing FoDLAT-Flag with GFP or  
1188 FoSir5-GFP and elution from anti-GFP agarose. The fusion proteins were detected  
1189 with anti-Flag or anti-GFP antibody. **(B)** *In vitro* pull-down assays to detect  
1190 FoSir5-His with MBP or the FoDLAT-MBP fusion protein. FoDLAT-MBP was used  
1191 as bait to pull down the FoSir5-His protein from the induced cell extracts. The MBP  
1192 protein was assayed as a negative control. Input and bound forms of the pull-down  
1193 fractions were detected with anti-His or anti-MBP antibody. **(C-D)** The K148  
1194 crotonylation (anti-K148cr-FoDLAT, top panel) and amount (anti-GFP, bottom panel)  
1195 of FoDLAT-GFP and its mutant isoforms in the  $\Delta$ FoSir5 (C) and OE-1 strain (D).  
1196 Proteins were immunoprecipitated with anti-GFP antibody agarose beads and  
1197 analyzed by anti-K148cr-FoDLAT or anti-GFP antibody. Representative gels are

1198 shown from experiments carried out at least twice. Numbers below the blots represent  
1199 the relative abundance of K148-crotonylated FoDLAT. Anti-GFP immunoblotting was  
1200 used to show equal loading. **(E)** FoSir5 directly decrotonylates FoDLAT *in vitro*.  
1201 Purified FoDLAT protein or its K148Q isoform (50 ng) were incubated with or  
1202 without 50 ng of purified FoSir5 in the absence or presence of 5 mM NAD<sup>+</sup> and then  
1203 analyzed by immunoblotting using anti-K148cr-FoDLAT or anti-His antibody. Each  
1204 gel shown is representative of two experiments. Numbers below the blots represent  
1205 the relative abundance of K148-crotonylated FoDLAT. Anti-MBP immunoblotting  
1206 was used to show equal loading. **(F-G)** FoSir5 and K148 mutant FoDLAT affected  
1207 PDC activity (F) and acetyl-CoA production (G) in *F. oxysporum*. PDC activity and  
1208 acetyl-CoA production were determined in germinating conidia at 8 h. The presence  
1209 of different letters above the mean values of three replicates indicates a significant  
1210 difference between different strains ( $P < 0.05$ , ANOVA). (The red arrow indicates the  
1211 original SDS-PAGE gels that were cropped for this panel.)

1212

1213 **Figure 2-figure supplement 2- source data.** Generation of targeted *FoSir5* gene  
1214 deletion mutants and overexpression transformants. **(A)** Schematic representation of  
1215 the targeted deletion of *FoSir5*. **(B)** PCR analysis of targeted deletion in the  $\Delta$ FoSir5  
1216 strains. Genomic DNA was analyzed by PCR with the primer pairs indicated in panel  
1217 **(A)**. **(C-D)** RT-PCR (C) and WB (D) analysis of the FoSir5-Flag-overexpression  
1218 transformants. Data of RT-PCR are the means  $\pm$  SDs ( $n = 3$ ); \*\* $P < 0.05$  by unpaired  
1219 two-tailed t-test. **(E)** Mycelial growth of the indicated strains on PDA plates after 3

1220 days of cultivation. (The red arrow indicates the original AGE or SDS–PAGE gels  
1221 that were cropped for this panel.)

1222

1223 **Figure 2-figure supplement 3- source data.** Detection of crotonylation,  
1224 succinylation, malonylation, and glutarylation on FoDLAT protein in  $\Delta$ FoSir5  
1225 compared with Fo. Proteins were immunoprecipitated with anti-GFP antibody agarose  
1226 beads and analyzed by Western blot using the indicated antibodies. Representative  
1227 gels are shown from experiments carried out at least twice. Anti-GFP immunoblotting  
1228 was used to show equal loading. (The red arrow indicates the original SDS–PAGE  
1229 gels that were cropped for this panel.)

1230

1231 **Figure 3- source data.** The downregulation of H3K18 crotonylation by FoSir5 and  
1232 transcriptional repression of aerobic respiration-related genes. **(A)** Western blot  
1233 analysis showed the effect of FoSir5 on histone H3K18 crotonylation and acetylation,  
1234 and histone H3K9 crotonylation using the indicated antibodies. Numbers below the  
1235 blots represent the relative abundance of different modifications. Anti-H3  
1236 immunoblotting was used to show equal loading. **(B)** RNA-seq analysis of 8  
1237 upregulated genes involved in aerobic respiration including *NDHB1* (NADH-quinone  
1238 oxidoreductase chain B 1), *MDH* (malate dehydrogenase), *CYC1* (cytochrome C1),  
1239 *IDH2* (isocitrate dehydrogenase subunit 2), *SDH* (succinate dehydrogenase), *ATP5H*  
1240 (ATP synthase D chain), *NDH8* (NADH dehydrogenase iron-sulfur protein 8), and  
1241 *CYBS* (succinate dehydrogenase cytochrome b small subunit). Differential expression

1242 in three biological replicates illustrated using a heat map with coloured squares  
1243 indicating the range of expression referred to as the FPKM value. (C) qRT-PCR  
1244 validation of aerobic respiration-related genes in the indicated strains. The letters  
1245 above the mean values of three replicates indicate significant differences between  
1246 different strains ( $P < 0.05$ , ANOVA). (D-E) Relative enrichment of the  
1247 immunoprecipitated promoter regions in aerobic respiration-related genes determined  
1248 using anti-GFP antibody in the FoSir5-GFP strain and Fo strain containing GFP alone  
1249 (D) or using anti-H3K18cr antibody in the Fo and  $\Delta$ FoSir5 mutant strains (E). The  
1250 fold enrichment was normalized to the input and internal control gene ( *$\beta$ -tubulin*).  
1251 Data are the means  $\pm$  SDs ( $n = 3$ );  $**P < 0.05$  by unpaired two-tailed t-test. (The red  
1252 arrow indicates the original SDS-PAGE gels that were cropped for this panel.)

1253

1254 **Figure 4- source data.** FoSir5 affects ATP production during germination in *F.*  
1255 *oxysporum*. (A-B) Western blot analysis showed the dynamic changes of FoDLAT  
1256 K148 (A) and histone H3K18 (B) crotonylation during germination using the  
1257 indicated antibodies. Numbers below the blots represent the relative abundance of  
1258 FoDLAT-K148cr or H3K18cr. Anti-GFP or anti-H3 immunoblotting was used to show  
1259 equal loading, respectively. (C-D) PDC activity (C) and acetyl-CoA production (D) in  
1260 *F. oxysporum* during germination were determined. (E) Expression profile of the  
1261 aerobic respiration-related genes during the germination process. (F) Relative  
1262 enrichment of the immunoprecipitated promoter regions in aerobic respiration-related  
1263 genes during germination determined using anti-GFP antibody in the FoSir5-GFP

1264 strain driven by the native promoter. The fold enrichment was normalized to the input  
1265 and internal control gene (*β-tubulin*). **(G)** ATP content of *F. oxysporum* during  
1266 germination. **(H)** Effect of FoSir5 on the ATP content of the indicated strains, as  
1267 determined in germinating conidia at 8 h post incubation (h.p.r.). The presence of  
1268 different letters (A-H) above the mean values of three replicates indicates a significant  
1269 difference between different samples ( $P < 0.05$ , ANOVA). (The red arrow indicates  
1270 the original SDS–PAGE gels that were cropped for this panel.)

1271

1272
